# Supplementary material for: Breakthrough oxygen electrode reaction kinetics using BaCe0.7Zr0.1Y0.1Yb0.1O3−δ based composite air electrodes for reversible solid oxide cells
Source: Research Square preprint supplement (doi:10.21203/rs.3.rs-6308895/v1), 2025-04-10
Supplement: Supplementary file 1 [file a6e4ee745b78b4127d88752f.docx]

**Supplementary Information**

**Breakthrough oxygen electrode reaction kinetics using BaCe0.7Zr0.1Y0.1Yb0.1O3−δ based** **composite air electrodes for reversible solid oxide cells**

**Kwangho Park1, £, WonJun Lee2, £, Junghyun Park3, Minkyeong Jo1, Yeongeun Bae1, Minji Kim1, Ryan O'Hayre4,*, Jeong Woo Han2,*, Sun-ju Song3,*, Jun-Young Park1,***

1 HMC, Department of Nanotechnology and Advanced Materials Engineering, Sejong University, Seoul 05006, Republic of Korea

2 Department of Materials Science and Engineering, Seoul National University, Seoul 08826, Republic of Korea

3 Department of Materials Science and Engineering, Chonnam National University, Gwangju 61186, Republic of Korea

4 Department of Metallurgical and Materials Engineering, Colorado School of Mines, Golden, Co 80401, United States

**£**Kwangho Park**and** WonJun Lee **contributed equally as first authors.**

* Correspondence and requests for materials should be addressed to Ryan O'Hayre (rohayre@mines.edu),Jeong Woo Han (jwhan98@snu.ac.kr), Sun-Ju Song (song@chonnam.ac.kr), and Jun-Young Park (jyoung@sejong.ac.kr).

**Supplementary Table 1. ASR values calculated from DRT reaction peak (P1‒P5) of various composite air electrodes on GDC-supported symmetric cells at 700‒800℃.**

| **Cell configurations** | **Resistance (Ω·cm2) at 800℃ (peak number)** | | | | |
| --- | --- | --- | --- | --- | --- |
| **Oxygen electrode (this work)** | **P1** | **P2** | **P3** | **P4** | **P5** |
| LSCF-GDC | 0.02 | 0.02 | 0.06 | 0.02 | 0.01 |
| LSCF-BCZYYb7111 | 0.05 | 0.05 | 0.01 | 0.01 | 3×10-3 |
| GCCCO-GDC | 0.03 | 0.03 | 0.12 | 0.03 | 4×10-3 |
| GCCCO-LSCF | 0.02 | 0.02 | 0.07 | 0.03 | 4×10-3 |
| GCCCO-BZY | 0.03 | 0.03 | 0.02 | 4×10-3 | 4×10-3 |
| GCCCO-BCY | 0.03 | 0.04 | 0.01 | 4×10-3 | 1×10-3 |
| GCCCO-BCZY | 0.03 | 0.04 | 0.01 | 2×10-3 | 3×10-3 |
| GCCCO-BCZYYb4411 | 0.03 | 0.04 | 0.02 | 4×10-3 | 3×10-3 |
| GCCCO-BCZYYb7111 (6:4 wt.%) | 0.02 | 0.02 | 0.03 | 3×10-3 | 1×10-3 |
| **GCCCO-BCZYYb7111 (8:2 wt.%)** | **0.01** | **0.01** | **0.01** | **1×10-3** | **1×10-3** |
|  | **Resistance (Ω·cm2) at 750℃** | | | | |
| LSCF-GDC | 0.03 | 0.02 | 0.06 | 0.05 | 0.07 |
| LSCF-BCZYYb7111 | 0.05 | 0.09 | 0.04 | 0.01 | 2×10-5 |
| GCCCO-GDC | 0.06 | 0.03 | 0.27 | 0.02 | 4×10-3 |
| GCCCO-LSCF | 0.04 | 0.03 | 0.12 | 0.03 | 2×10-3 |
| GCCCO-BZY | 0.04 | 0.04 | 0.09 | 0.01 | 2×10-3 |
| GCCCO-BCY | 0.02 | 0.06 | 0.03 | 0.01 | 1×10-3 |
| GCCCO-BCZY | 0.04 | 0.06 | 0.02 | 0.01 | 3×10-3 |
| GCCCO-BCZYYb4411 | 0.05 | 0.06 | 0.05 | 2×10-3 | 2×10-3 |
| GCCCO-BCZYYb7111 (6:4 wt.%) | 0.03 | 0.04 | 0.05 | 2×10-3 | 1×10-3 |
| **GCCCO-BCZYYb7111 (8:2 wt.%)** | **0.02** | **0.02** | **0.01** | **2×10-3** | **1×10-3** |
|  | **Resistance (Ω·cm2) at 700℃** | | | | |
| LSCF-GDC | 0.06 | 0.04 | 0.07 | 0.11 | 0.11 |
| LSCF-BCZYYb7111 | 0.04 | 0.04 | 0.17 | 0.09 | 0.01 |
| GCCCO-GDC | 0.13 | 0.08 | 0.24 | 0.20 | 0.14 |
| GCCCO-LSCF | 0.09 | 0.04 | 0.04 | 0.20 | 0.03 |
| GCCCO-BZY | 0.07 | 0.07 | 0.14 | 0.06 | 0.01 |
| GCCCO-BCY | 0.05 | 0.05 | 0.1 | 0.01 | 0 |
| GCCCO-BCZY | 0.03 | 0.02 | 0.1 | 0.06 | 2×10-3 |
| GCCCO-BCZYYb4411 | 0.09 | 0.07 | 0.06 | 0.09 | 3×10-3 |
| GCCCO-BCZYYb7111 (6:4 wt.%) | 0.04 | 0.13 | 0.09 | 0.01 | 3×10-3 |
| **GCCCO-BCZYYb7111 (8:2 wt.%)** | **0.02** | **0.06** | **0.02** | **1×10-3** | **2×10-3** |

**Supplementary Table 2. Fit results of TLM** **(*Rbs*, *Rint*, *Rpol*, *Cint*,, *k*, *and Leff*) from GCCCO-BCZYYb7111 cathode in Fig. 4 according to the equivalent circuit model.**

| **Fitting factor** | **Unit** | **Temperature (**℃**)** | | | | | |
| --- | --- | --- | --- | --- | --- | --- | --- |
| 800 | 750 | 700 | 650 | 600 | 550 |
| *R­bs* | Ω·cm2 | 0.05 | 0.09 | 0.14 | 0.27 | 0.45 | 0.77 |
| *Rint* | 0.01 | 0.02 | 0.03 | 0.07 | 0.14 | 0.30 |
| *Rpol* | 0.02 | 0.04 | 0.07 | 0.14 | 0.27 | 0.52 |
| *Cint* (× 10-3) | F·cm-2 | 7.50 | 3.98 | 2.62 | 1.38 | 0.88 | 0.79 |
|  | cm2·s-1 | 0.01 | 0.01 | 0.01 | 0.01 | 0.01 | 0.01 |
| *k* (× 104) | 1.48 | 1.42 | 1.18 | 1.04 | 0.81 | 0.42 |
| *Leff* | μm | 8.47 | 9.00 | 9.63 | 10.37 | 11.27 | 12.37 |

**Supplementary Table 3. DFT-calculated reaction free energies for oxygen exchange reactions of GCCCO-BCZYYb, GCCCO-GDC, and LSCF-GDC.**

| **Reaction step** | **Composite air electrode /eV** | | |
| --- | --- | --- | --- |
| GCCCO-BCZYYb | GCCCO-GDC | LSCF-GDC |
| O2 (g) → O2* | 0.14 | 1.96 | 2.41 |
| O2* → 2O* | 1.67 | −1.94 | −2.70 |
| 2O* → O2* | −2.84 | 2.43 | 2.86 |
| O2* → O2 (g) | 1.04 | −2.45 | −2.56 |

**Supplementary Table 4. DFT-calculated ICOHP values for bonds between interface oxygen and adjacent metals in GCCCO-BCZYYb and GCCCO-GDC.**

| **Composite**  **air electrode** | **Metals bonded to interface oxygen/ /eV** | | | |
| --- | --- | --- | --- | --- |
| Co1 | Co2 | Co3 | Ce |
| GCCCO-BCZYYb | 1.026 | 0.480 | 1.047 | 0.252 |
| GCCCO-GDC | 0.675 | 0.523 | 0.910 | 0.922 |

**Supplementary Table 5. DFT-calculated ICOHP values for bonds between interface oxygen and adjacent metals in LSCF-GDC.**

| **Composite**  **air electrode** | **Metals bonded to interface oxygen /eV** | | | | |
| --- | --- | --- | --- | --- | --- |
| La | Sr | Co | Fe | Ce |
| LSCF-GDC | 0.454 | 0.117 | 0.807 | 1.160 | 0.471 |

**Supplementary Table 6. DFT-calculated band gap, valence band maximum (VBM), conduction band maximum (CBM), and Fermi level (EF) of GCCCO, BCZYYb, GDC, and LSCF.** Since the electronic structure calculated by DFT corresponds to 0 K, the Fermi level has been thermally corrected to account for the actual reaction temperature by considering band gap and acceptor states in each material.

| **Materials** | **Bandgap** | **VBM** | **CBM** | **EF** |
| --- | --- | --- | --- | --- |
| GCCCO | 0.52 | −7.43 | −6.92 | −7.18 |
| BCZYYb | 2.65 | −4.41 | −1.76 | −3.98 |
| GDC | 1.94 | −5.18 | −3.24 | −4.89 |
| LSCF | 0.40 | −5.74 | −5.34 | −5.54 |

**
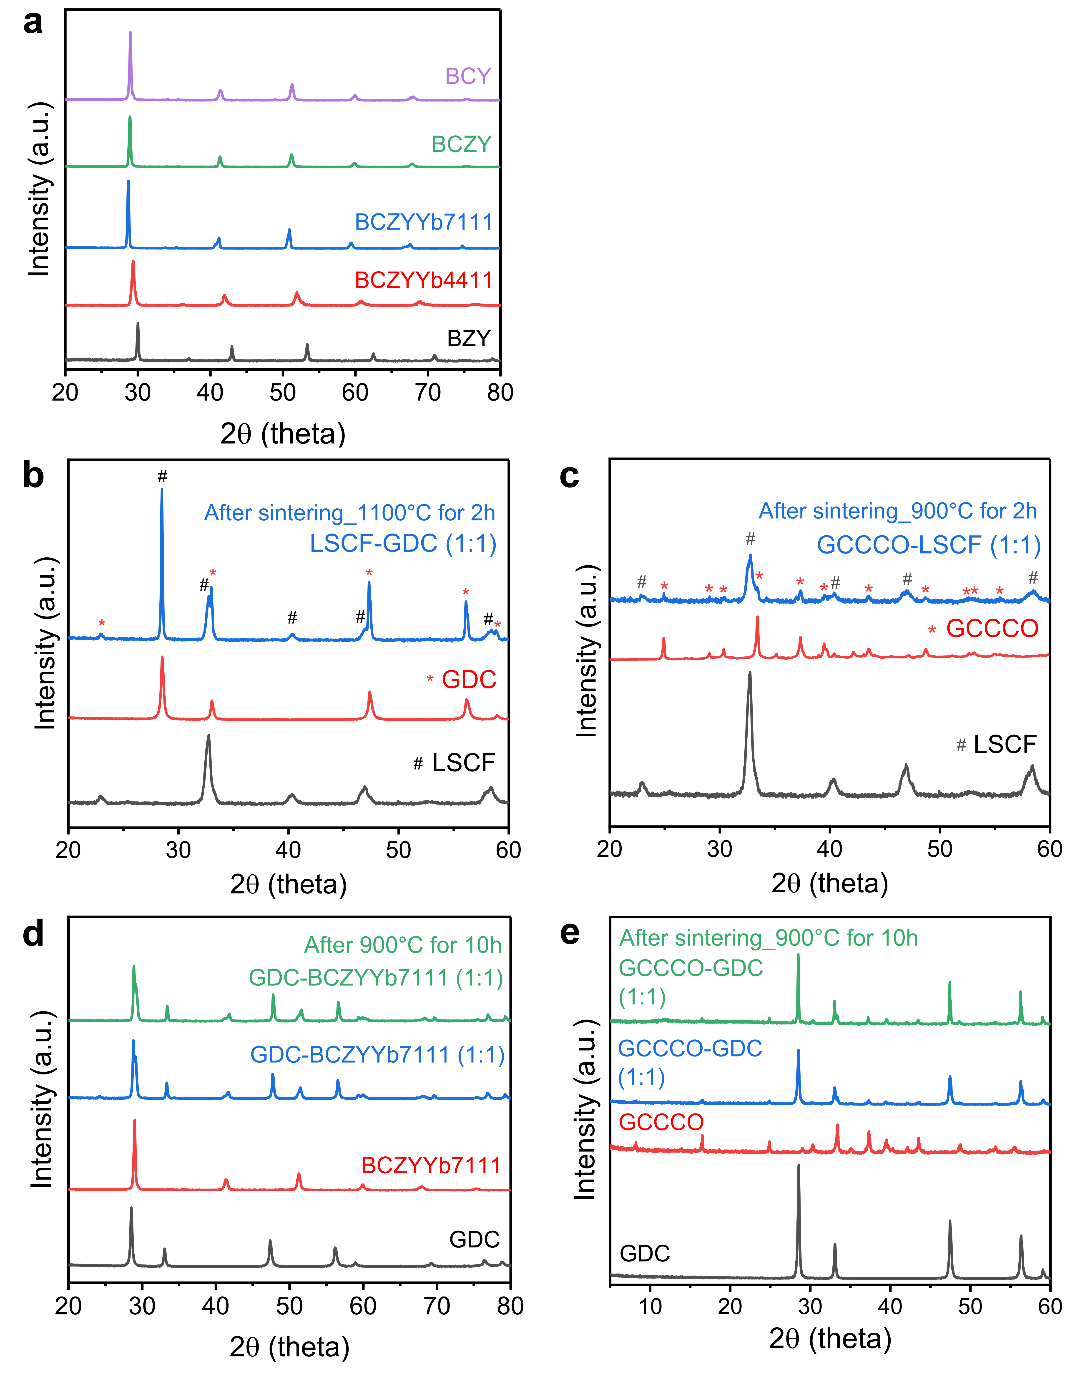
**

**Supplementary Figure 1. X-ray diffraction patterns of cell components for RSOCs. a**, BCZ-based proton conductors [BaZr0.9Y0.1O3−δ (BZY), BaCe0.9Y0.1O3−δ (BCY), BaCe0.7Zr0.1Y0.2O3−δ (BCZY), BaCe0.4Zr0.4Y0.1Yb0.1O3−δ (BCZYYb4411), and BaCe0.7Zr0.1Y0.1Yb0.1O3−δ (BCZYYb7111)]. **b‒e**, Thermal compatibility tests of LSCF and GDC (5:5 wt.%) before and after heat treatment at 1100℃ for 2 hours (**b**), GDC and LSCF (**c**), GDC and BCZYYb7111 (**d**), and GCCCO and GDC (5:5 wt.%) before and after heat treatment 900℃ for 10 hours (**e**).


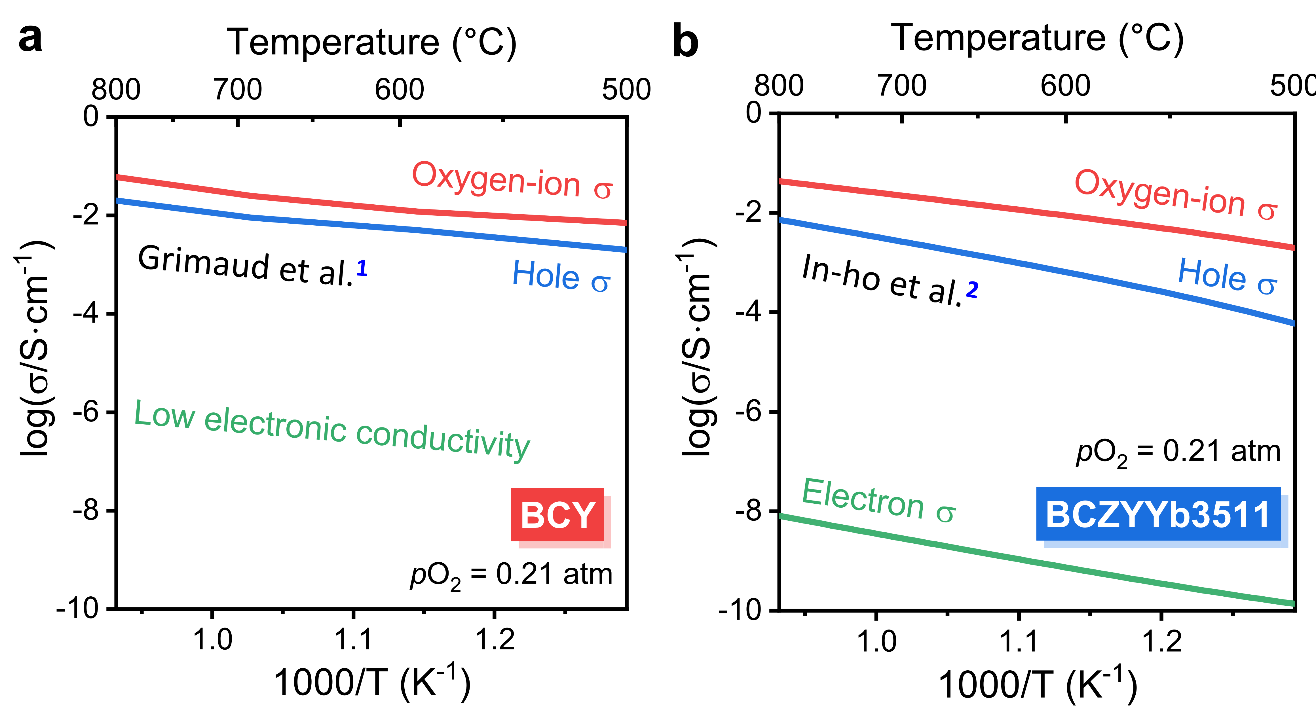


**Supplementary Figure 2. Partial conductivities of proton conductors. a**, BCY. **b**, BCZYYb3511.


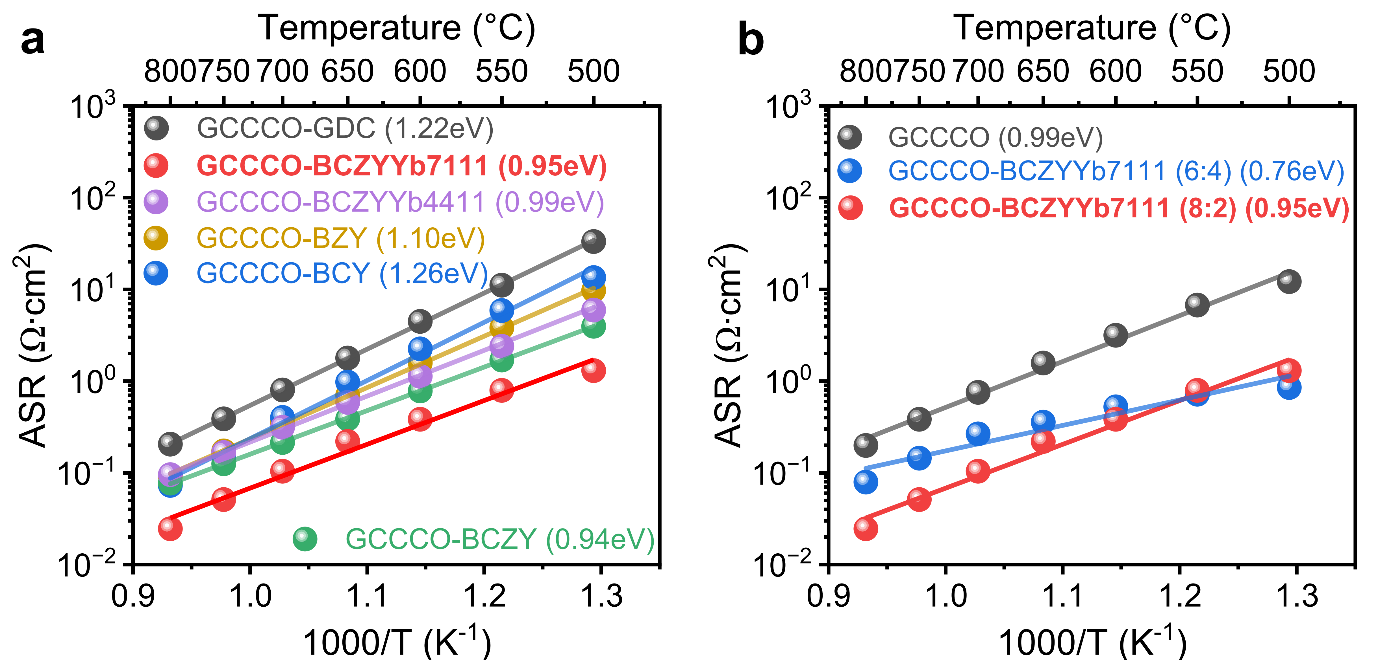


**Supplementary Figure 3. Arrhenius plot from EIS plots of composite GCCCO-BCZ materials on GDC-symmetric cell from 500 to 800℃. a**,ASR comparisons of GCCCO-GDC, GCCCO-BCZYYb7111, GCCCO-BCZYYb4411, GCCCO-BZY, GCCCO-BCY, and GCCCO-BCZY. **b**, Optimization of composition ratio of GCCCO and BCZYYb7111 on ASRs.

**
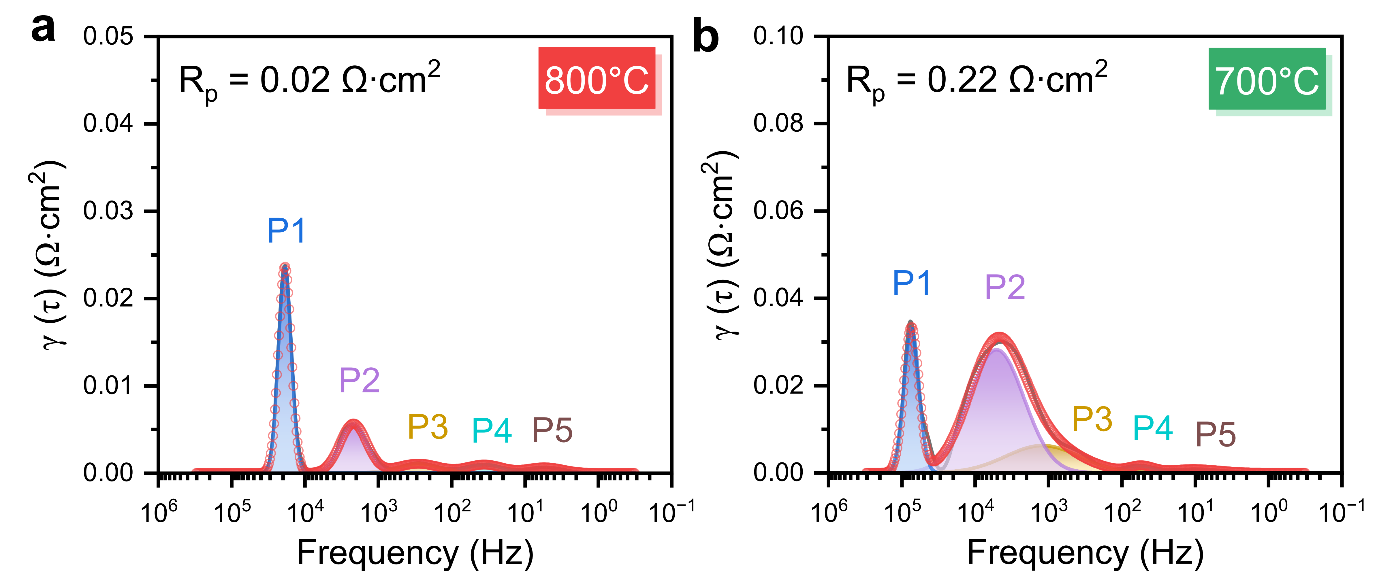
**

**Supplementary Figure 4. Distribution of relaxation times (DRT) analysis of GCCCO-BCZYYb7111 (8:2 wt.%) air electrode on a GDC-symmetric cell. a**, 800℃. **b**, 700℃.


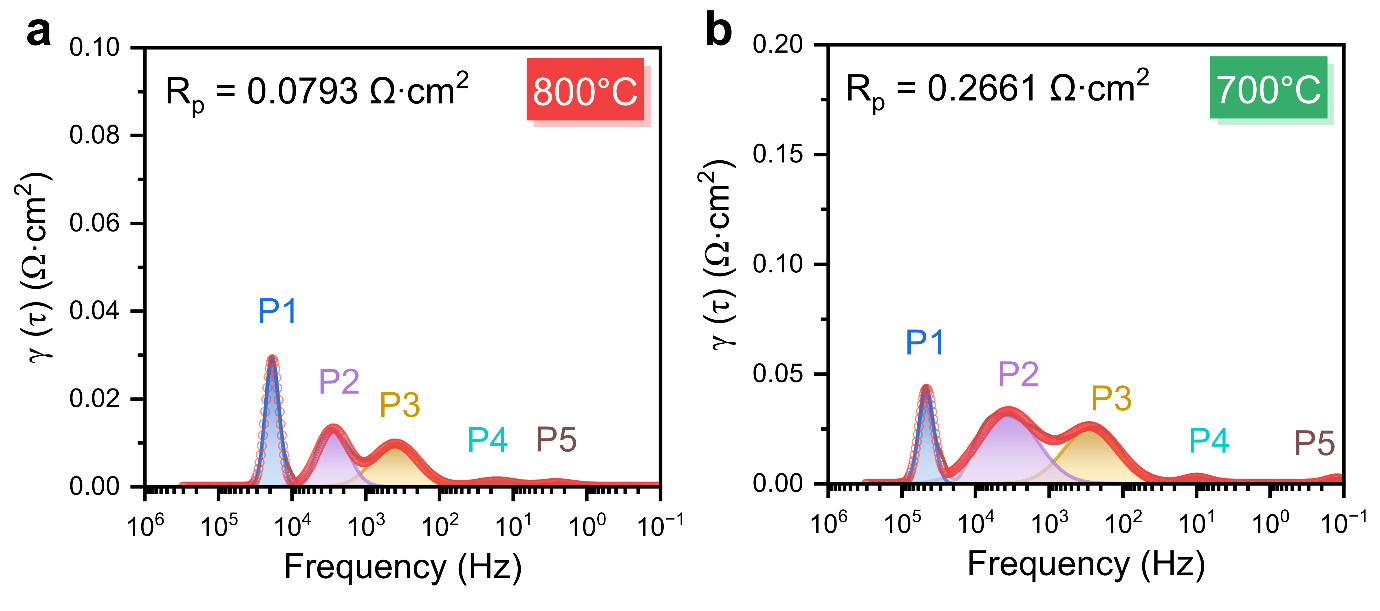


**Supplementary Figure 5. DRT analysis of GCCCO-BCZYYb7111 (6:4 wt.%) air electrode on a GDC-symmetric cell. a**, 800℃. **b**, 700℃.

**
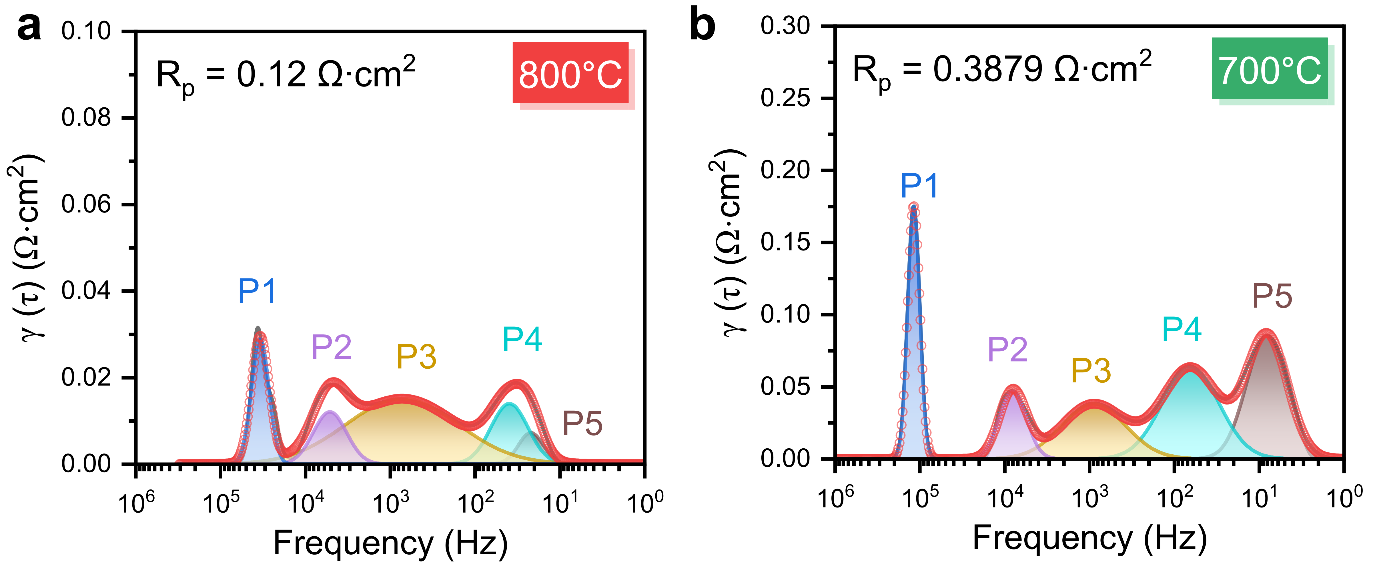
**

**Supplementary Figure 6. DRT analysis of LSCF-GDC (6:4 wt.%) air electrode on a GDC-symmetric cell. a**, 800℃. **b**, 700℃.


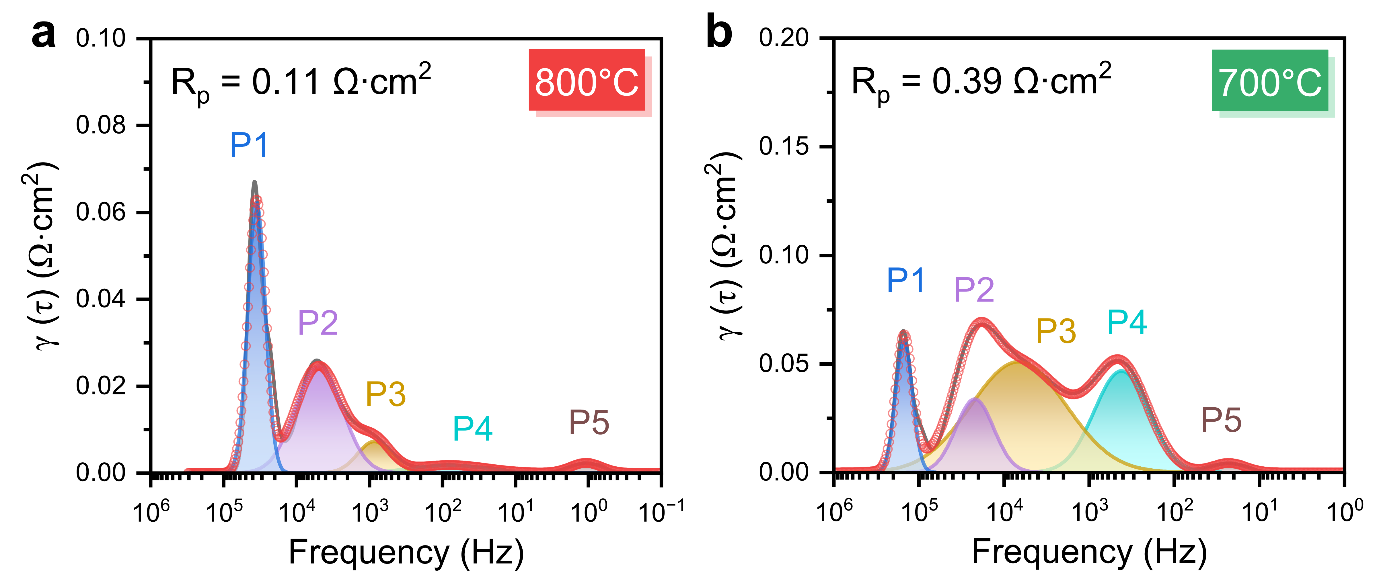


**Supplementary Figure 7. DRT analysis of LSCF-BCZYYb7111 (6:4 wt.%) air electrode on a GDC-symmetric cell. a**, 800℃. **b**, 700℃.

**
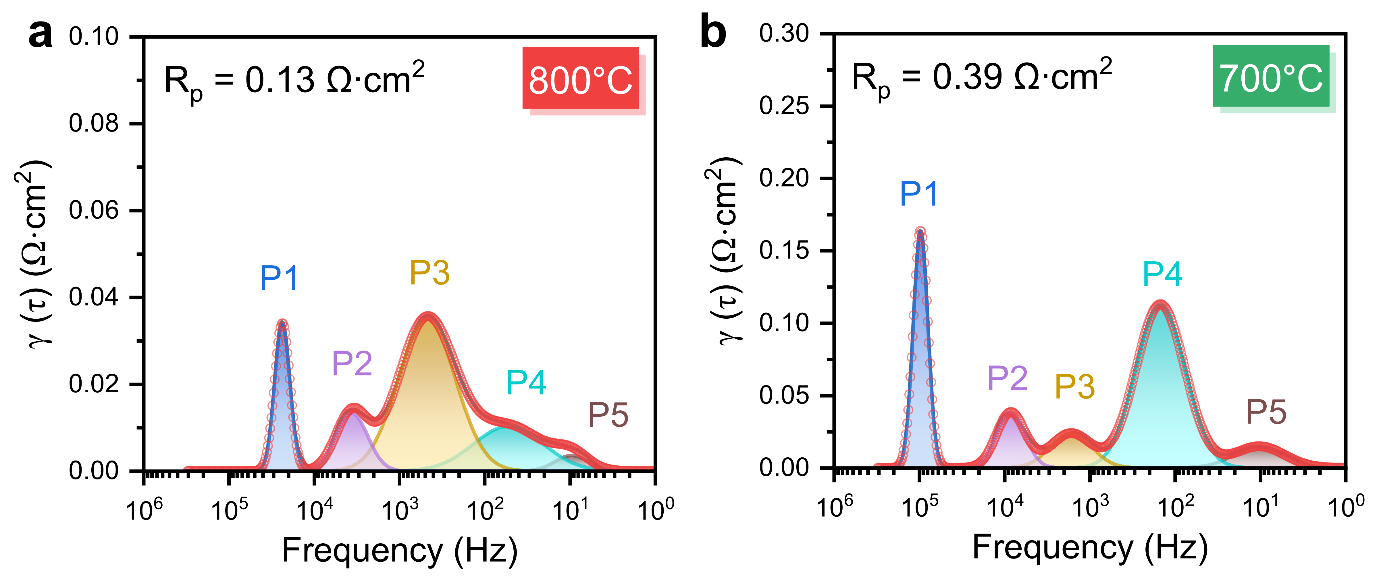
**

**Supplementary Figure 8. DRT analysis of GCCCO-LSCF (6:4 wt.%) air electrode on a GDC-symmetric cell. a**, 800℃. **b**, 700℃.

**
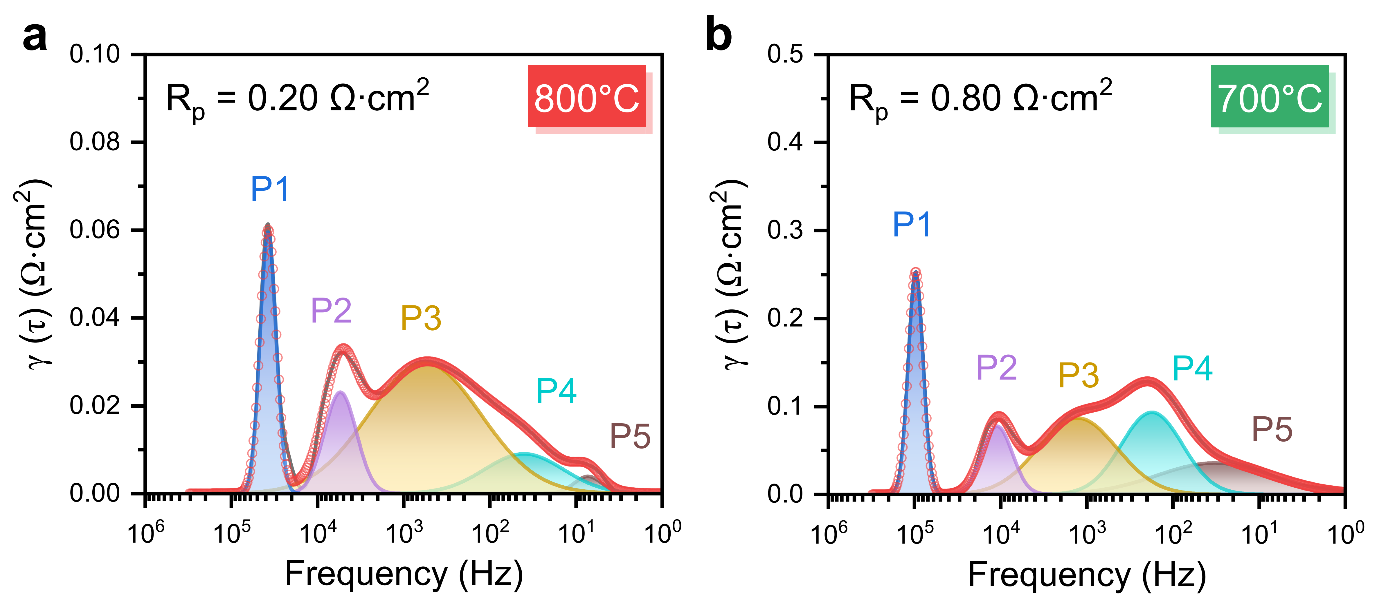
**

**Supplementary Figure 9. DRT analysis of GCCCO-GDC (6:4 wt.%) air electrode on a GDC-symmetric cell. a**, 800℃. **b**, 700℃.

**
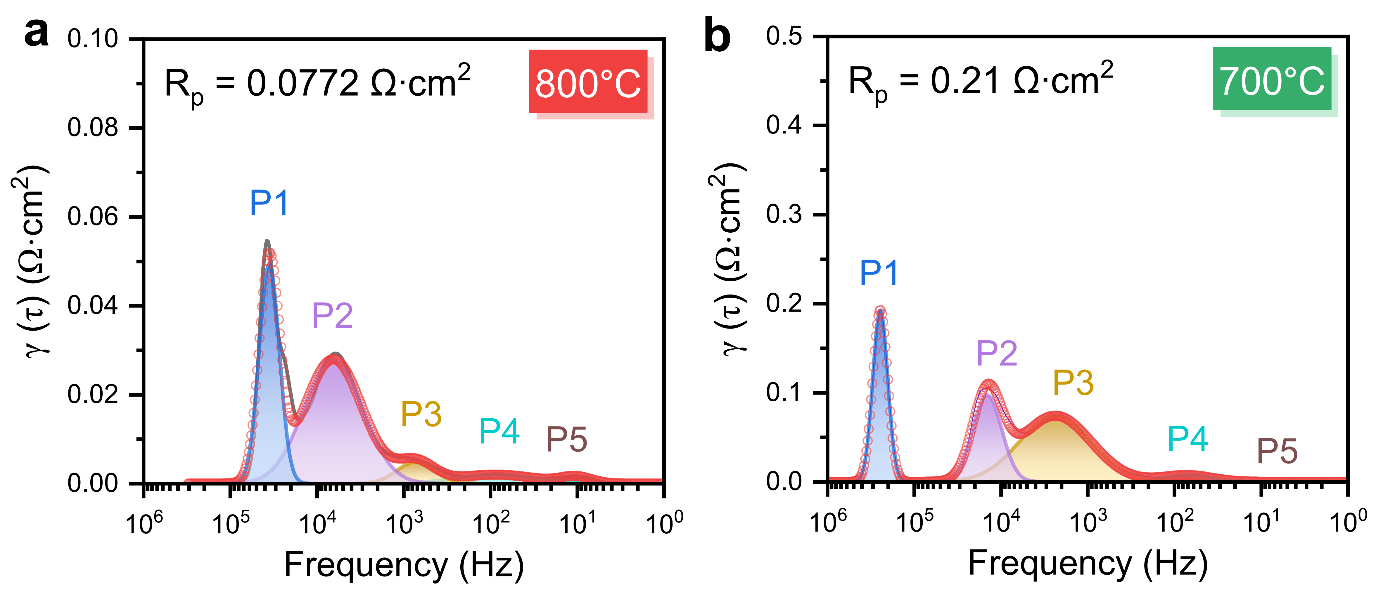
**

**Supplementary Figure 10. DRT analysis of GCCCO-BCY (6:4 wt.%) air electrode on a GDC-symmetric cell. a**, 800℃. **b**, 700℃.

**
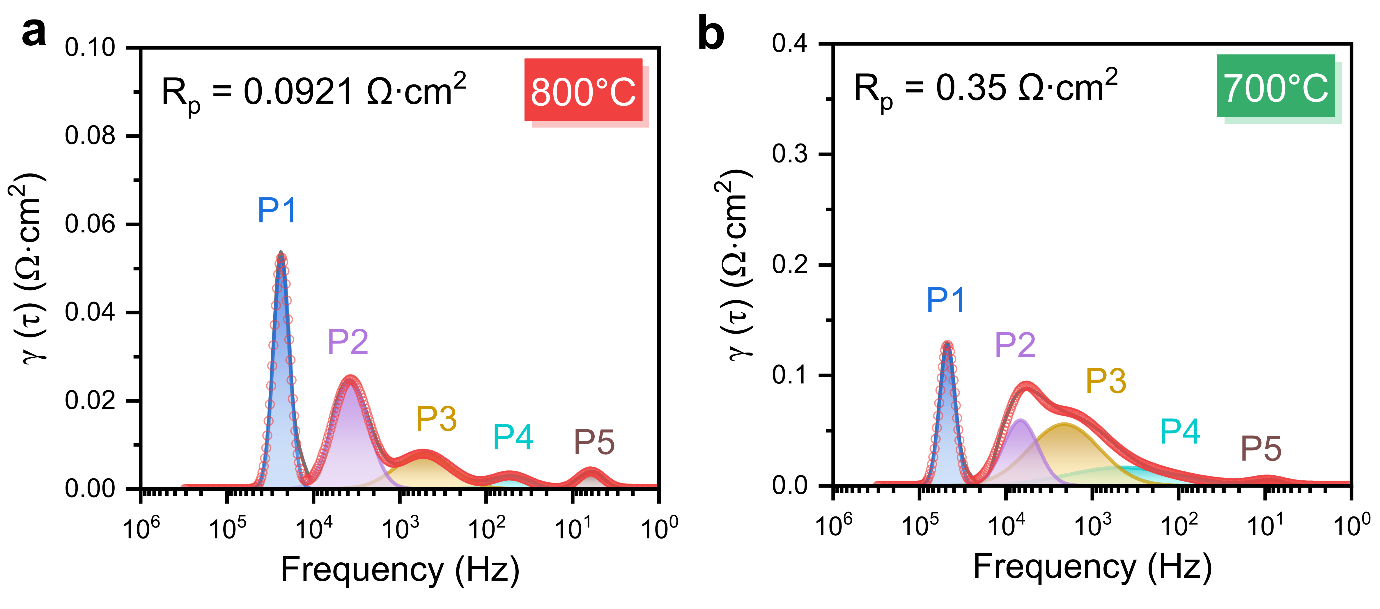
**

**Supplementary Figure 11. DRT analysis of GCCCO-BZY (6:4 wt.%) air electrode on a GDC-symmetric cell. a**, 800℃. **b**, 700℃.

**
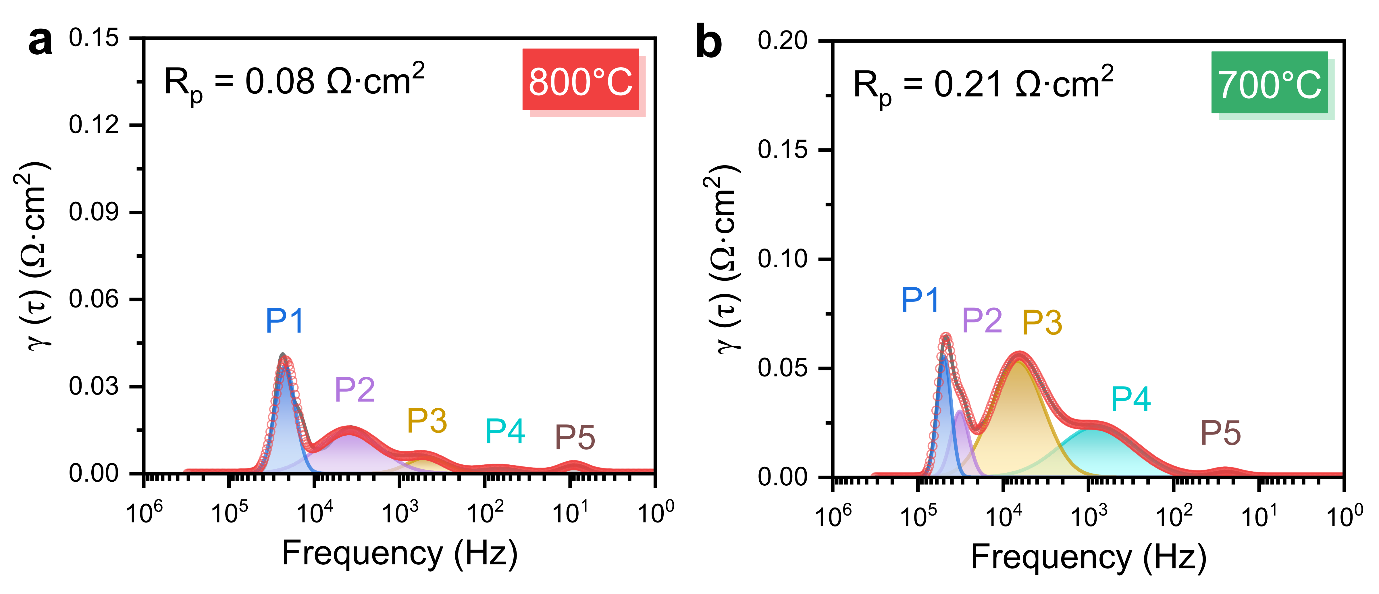
**

**Supplementary Figure 12. DRT analysis of GCCCO-BCZY (6:4 wt.%) air electrode on a GDC-symmetric cell. a**, 800℃. **b**, 700℃.

**
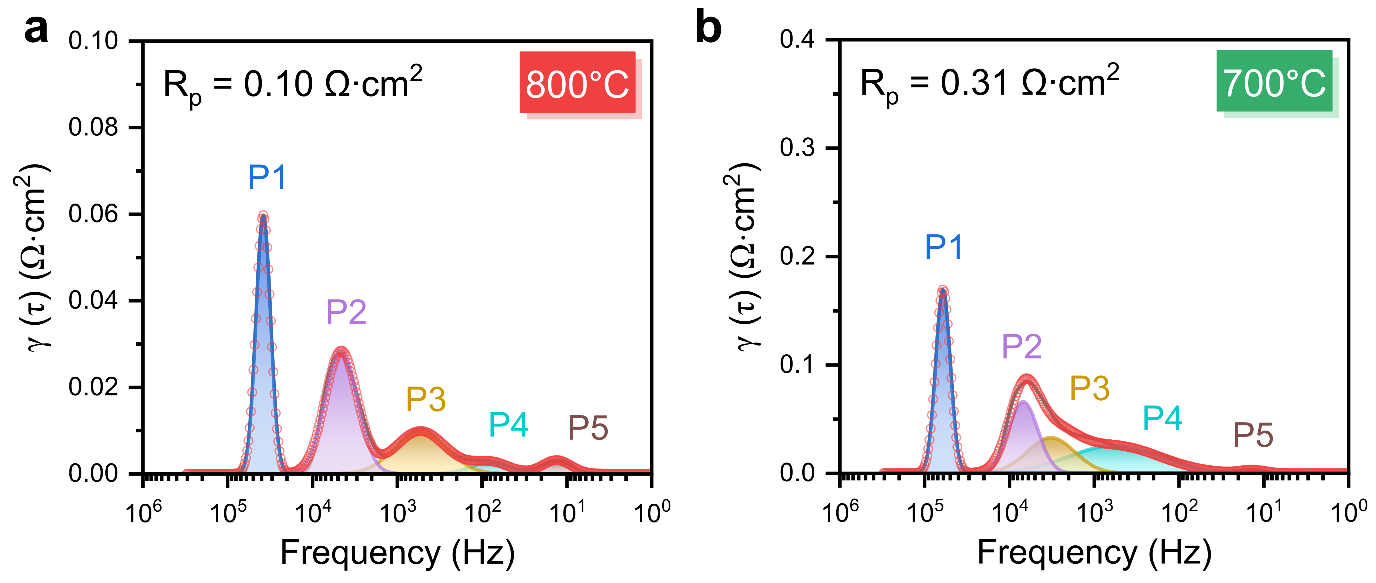
**

**Supplementary Figure 13. DRT analysis of GCCCO- BCZYYb4411 (6:4 wt.%) air electrode on a GDC-symmetric cell. a**, 800℃. **b**, 700℃.

**
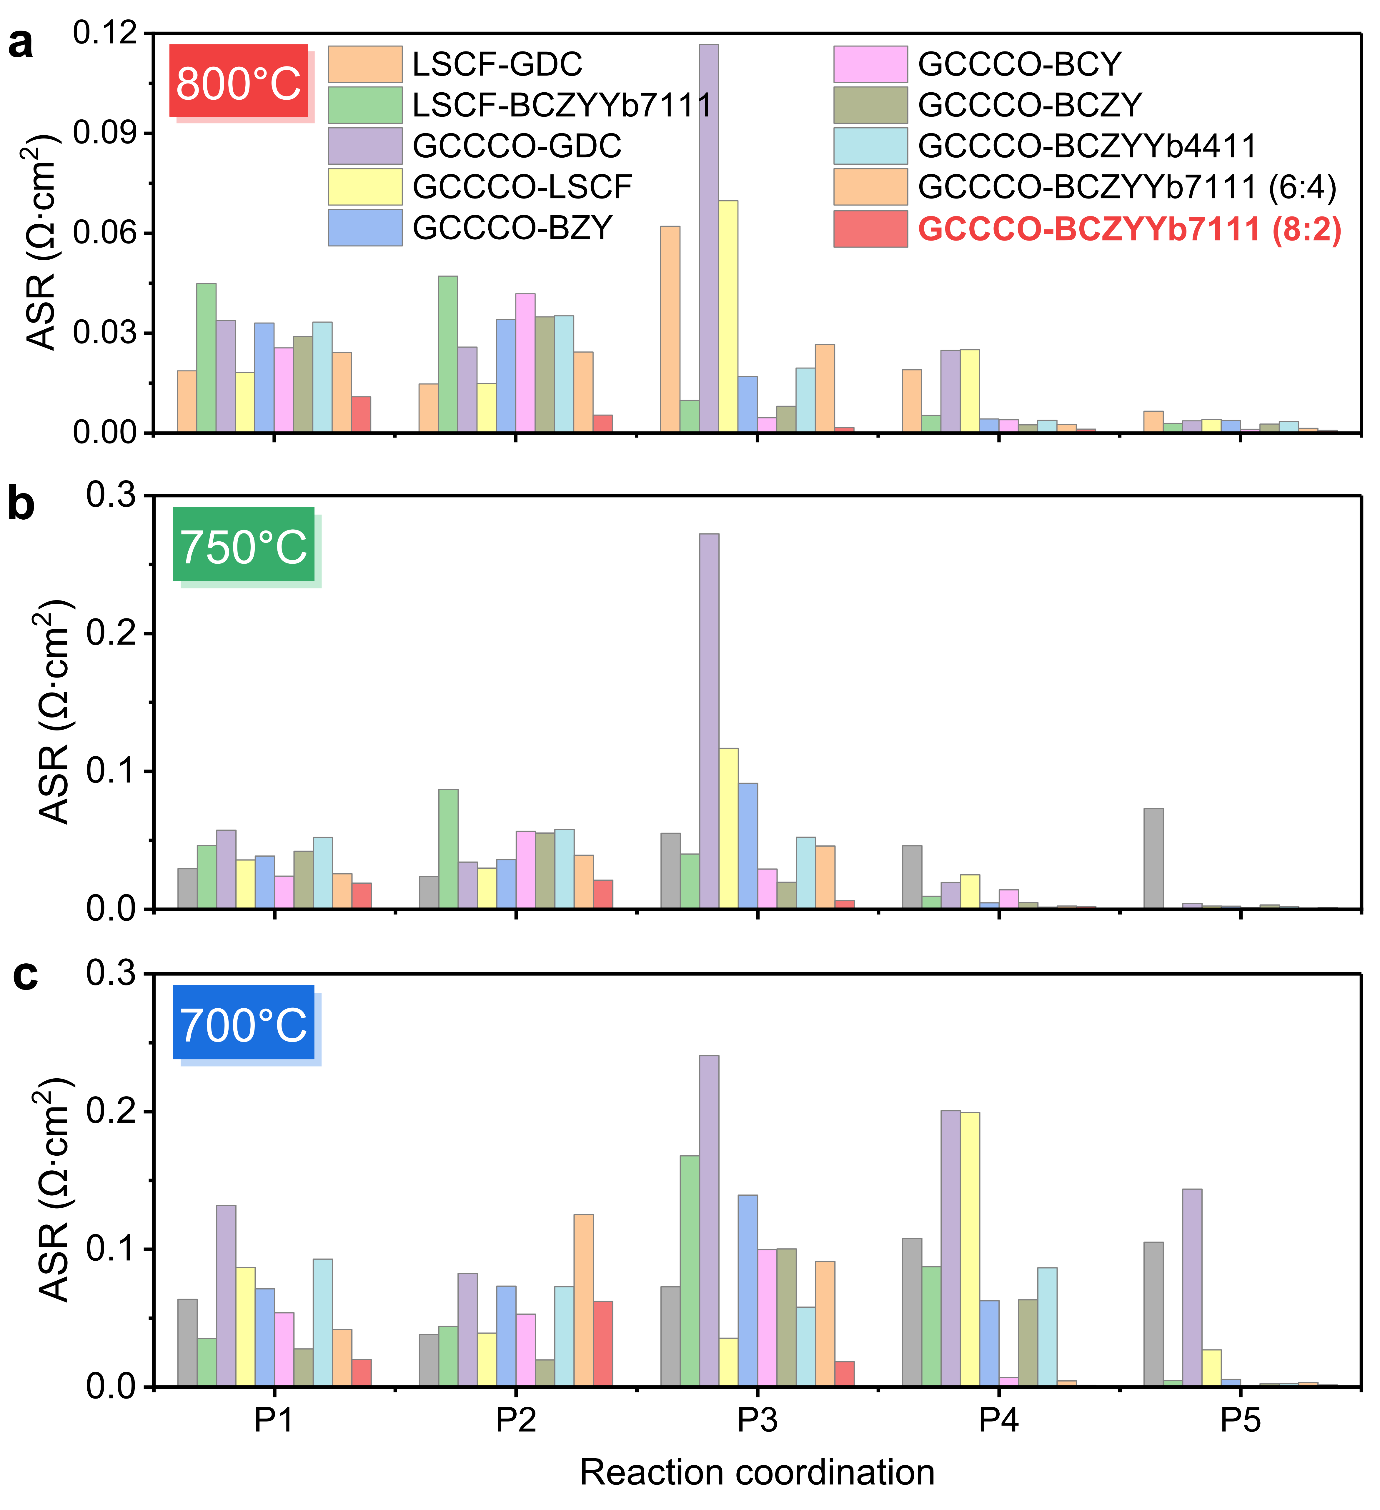
**

**Supplementary Figure 14. Comparison of DRT P1‒P5 peaks** **for various composite air electrodes. a**, 800℃. **b**, 700℃.

**
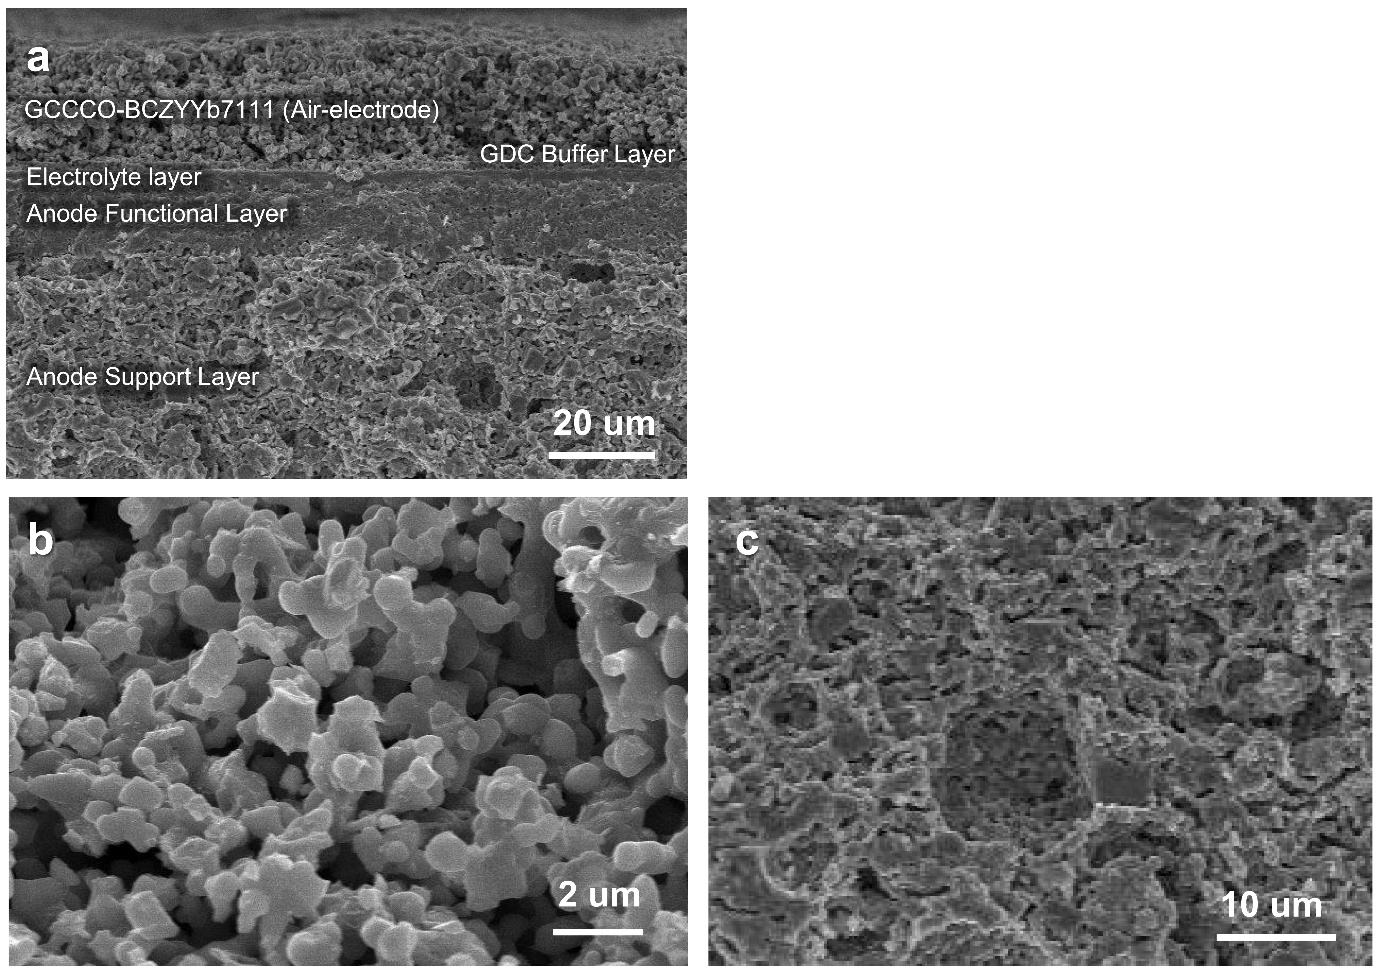
**

**Supplementary Figure 15. Microstructural analysis of GCCCO-BCZYYb7111 air-electrode applied on a NiO-YSZ fuel electrode-supported cell by FE-SEM. a**,Cross-section. **b**, Air electrode. **c,** Fuel electrode.

**
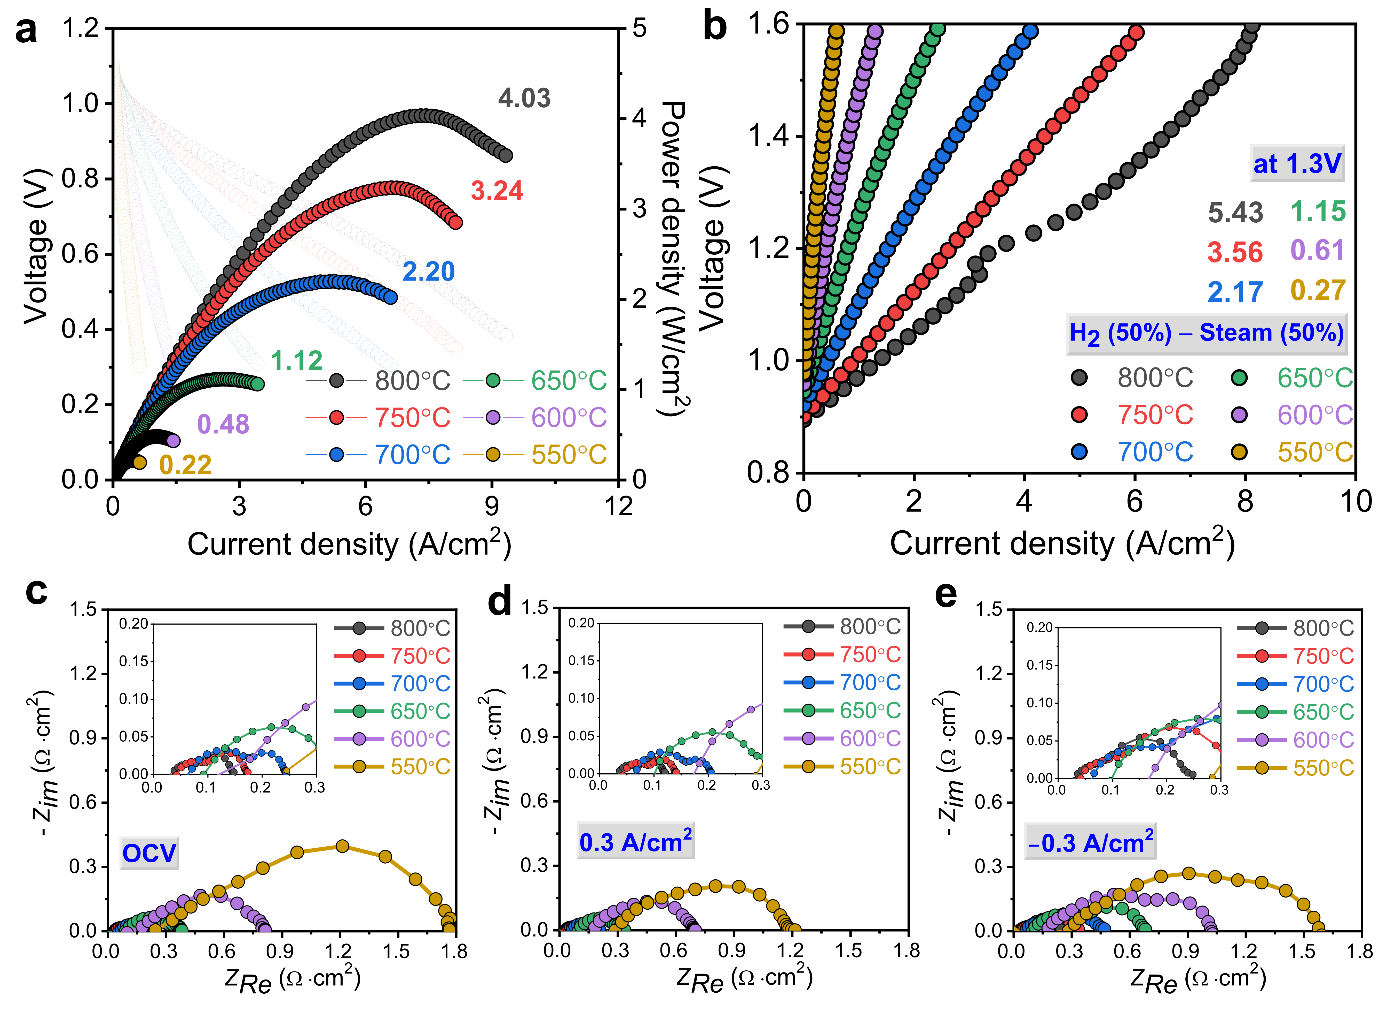
**

**Supplementary Figure 16. Electrochemical performances of GCCCO-LSCF air-electrode applied on a NiO-YSZ fuel electrode-supported cell at 550‒800℃. a**, **b**,I-V-P characteristics in SOFC (**a**) and SOEC (**b**) modes. **c‒e**, Nyquist plots from EIS measurements under OCV (**c**), 0.3 A∙cm−2 (**d**), and ‒0.3 A∙cm−2 (**e**) conditions.

**
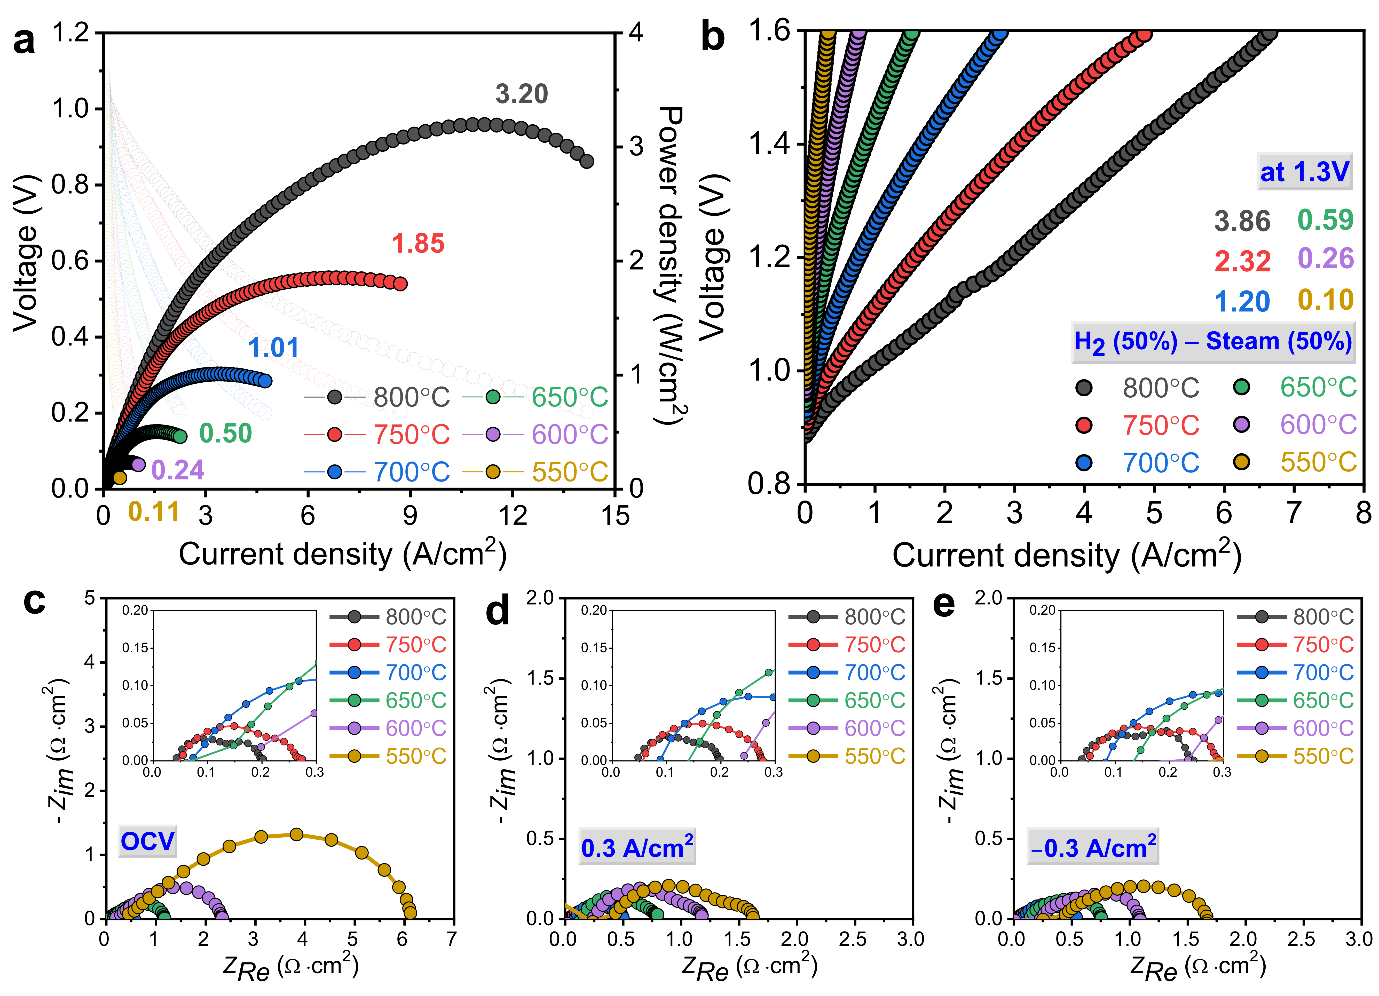
**

**Supplementary Figure 17. Electrochemical performances of GCCCO-GDC cell at 550‒800℃. a**, **b**,I-V-P characteristics in SOFC (**a**) and SOEC (**b**) modes. **c‒e**, Nyquist plots from EIS measurements under OCV (**c**), 0.3 A∙cm−2 (**d**), and ‒0.3 A∙cm−2 (**e**) conditions.

**
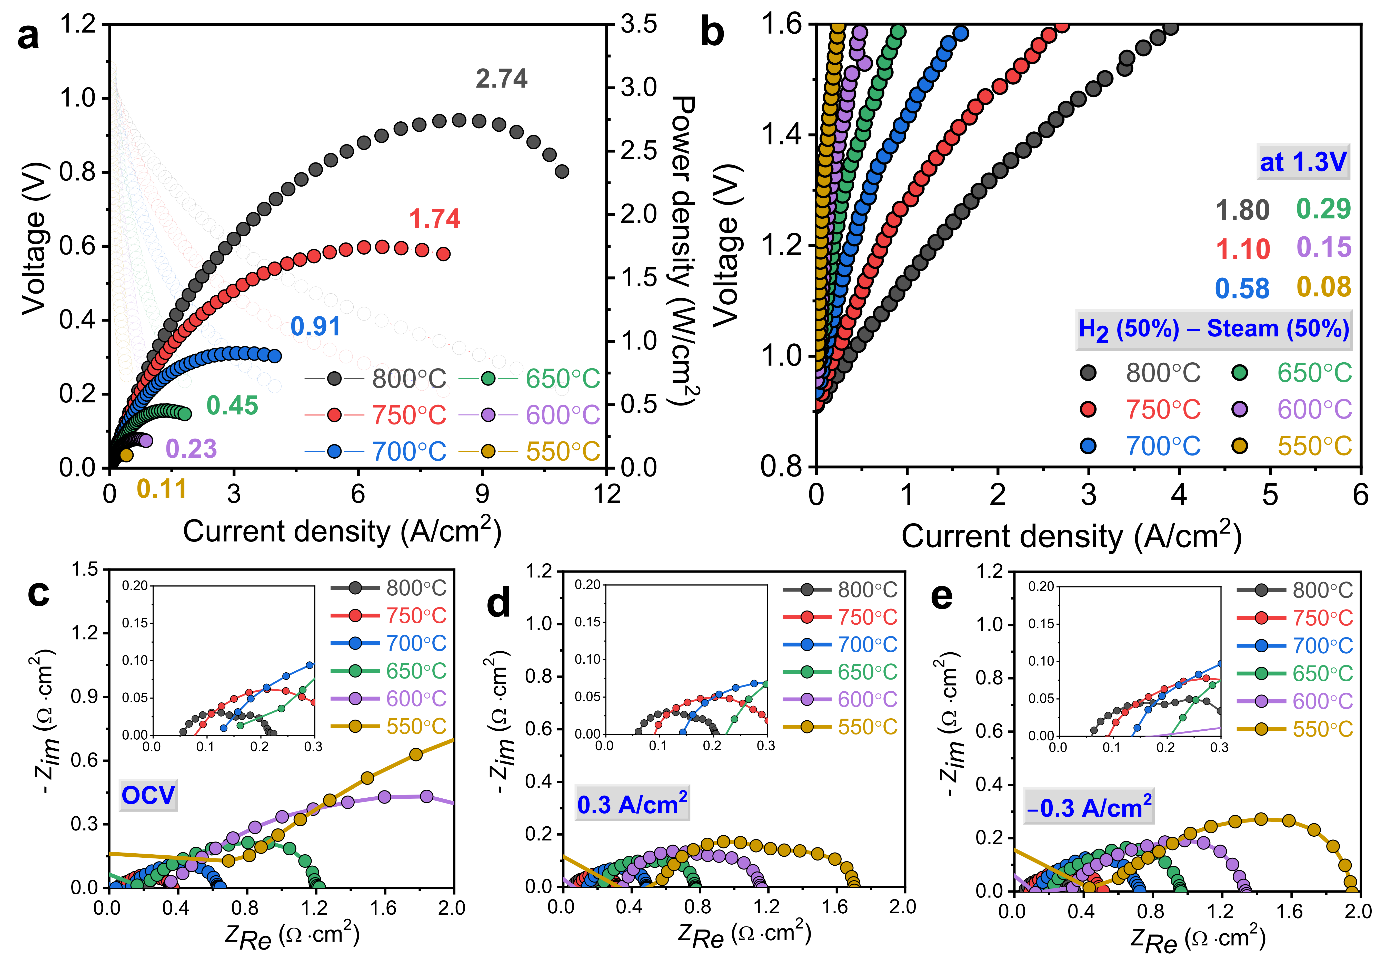
**

**Supplementary Figure 18. Electrochemical performances of LSCF-GDC cell at 550‒800℃. a**, **b**,I-V-P characteristics in SOFC (**a**) and SOEC (**b**) modes. **c‒e**, Nyquist plots from EIS measurements under OCV (**c**), 0.3 A∙cm−2 (**d**), and ‒0.3 A∙cm−2 (**e**) conditions.

**
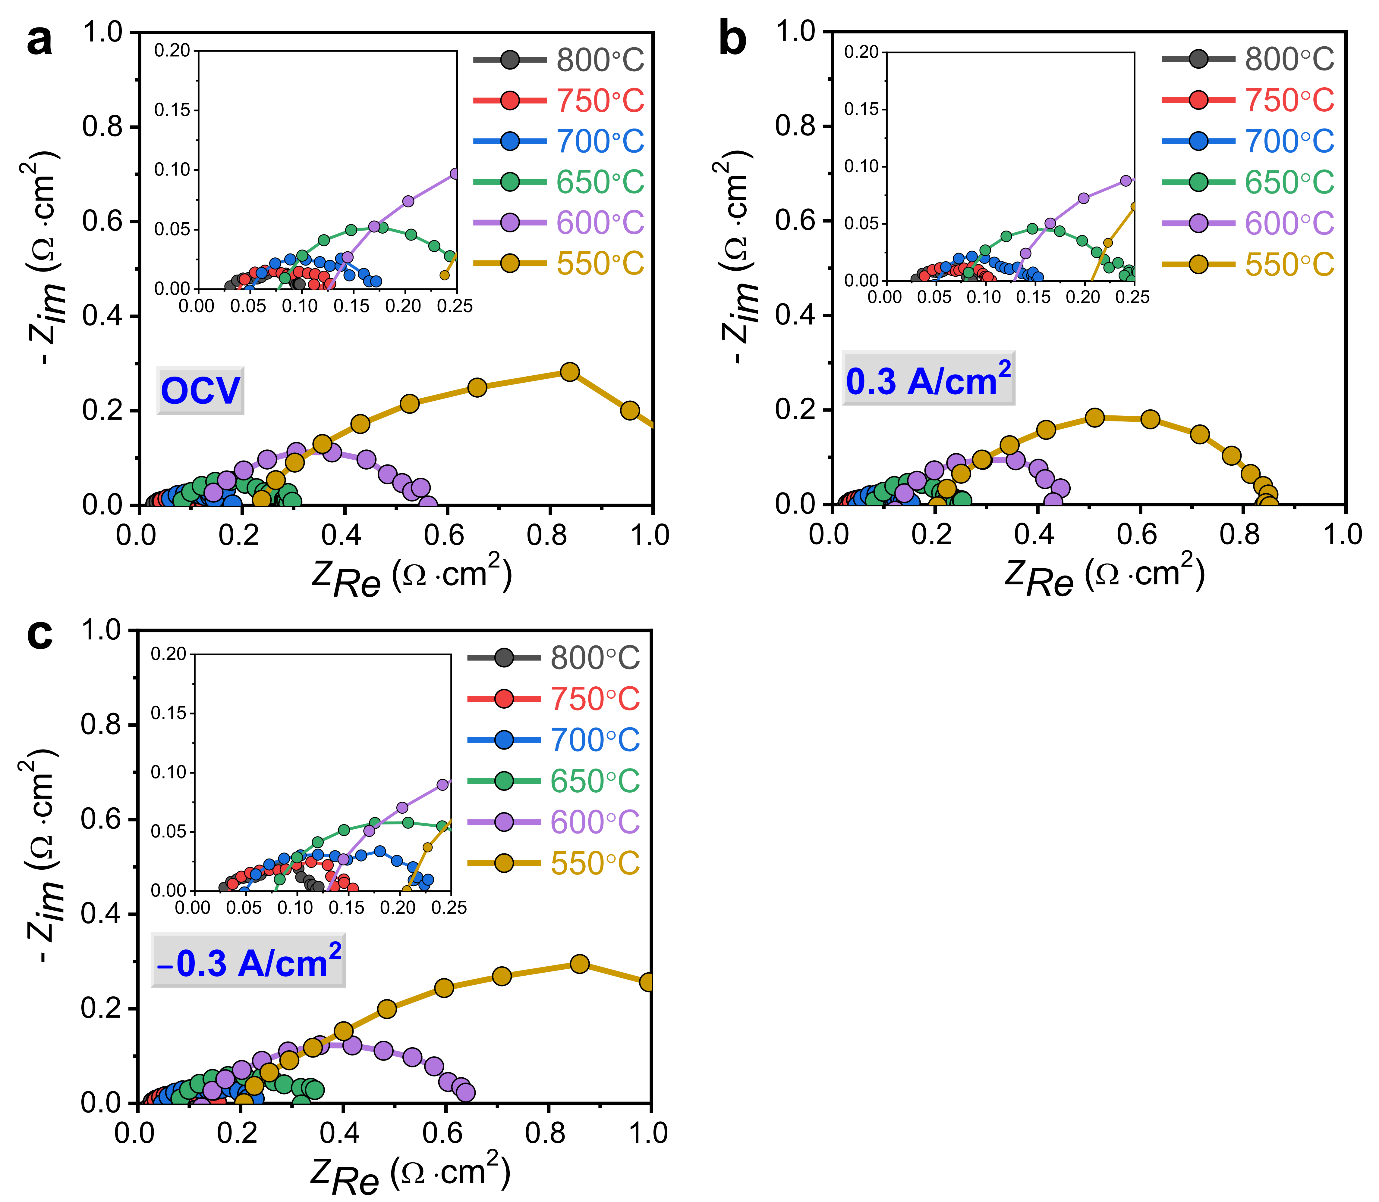
**

**Supplementary Figure 19. Nyquist plots from EIS measurements of GCCCO-BCZYYb7111 (8:2 wt.%) cell under various conditions. a**, OCV. **b**, 0.3 A∙cm−2. **c**, ‒0.3 A∙cm−2.

**
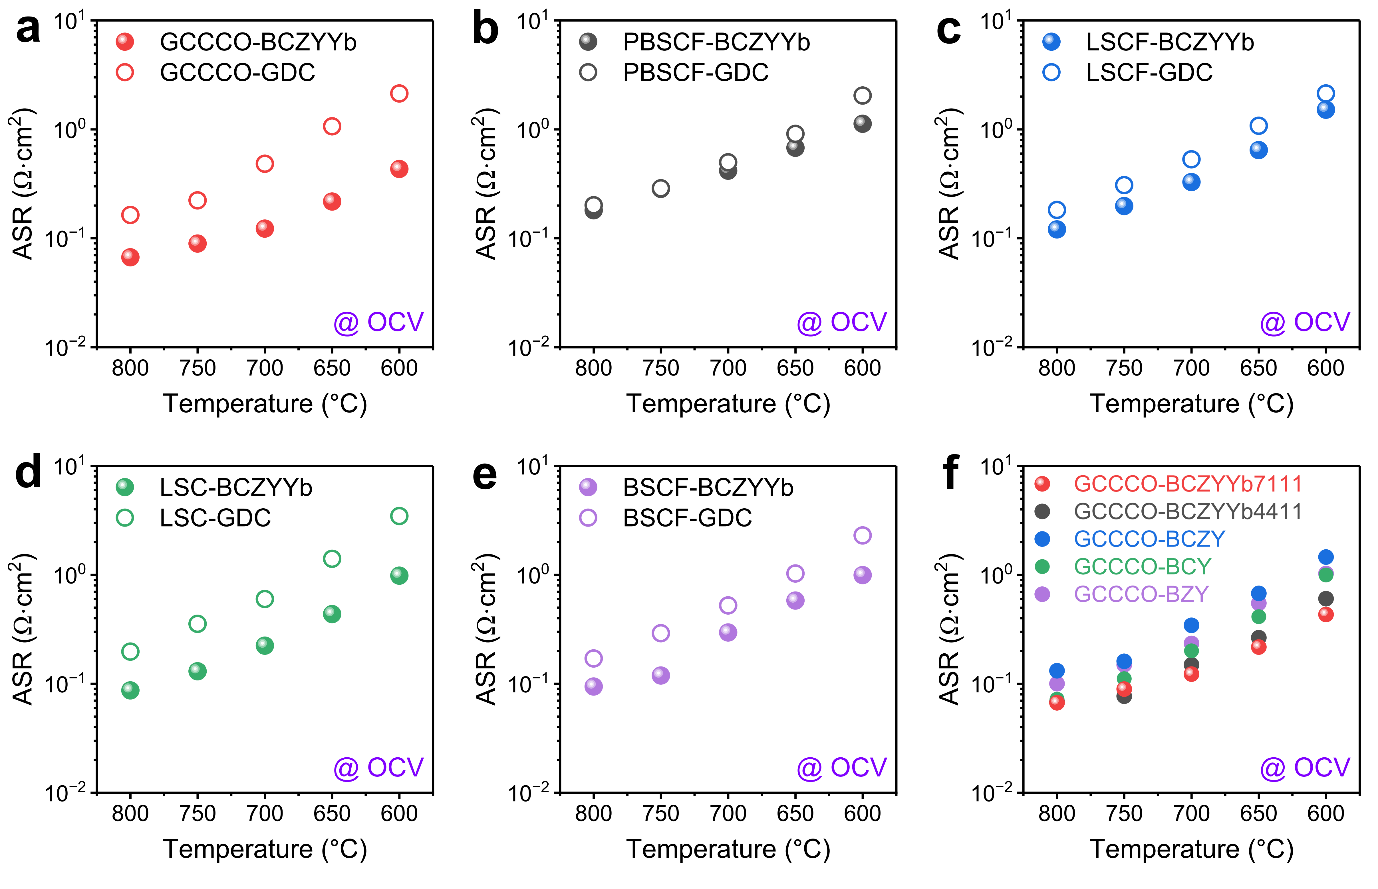
**

**Supplementary Figure 20. Comparison of electrode ASR values of various air electrode materials on NiO-YSZ supported cells under OCV. a**, GCCCO. **b**, PBSCF. **c**, LSCF. **d**, LSC. **e**, BSCF with BCZYYb7111 or GDC composite materials. **f**,GCCCO-M (M = BCZYYb7111, BCZYYb4411, BaCe0.7Zr0.1Y0.2O3−δ (BCZY), BaCe0.9Y0.1O3−δ (BCY), and BaZr0.9Y0.1O3−δ (BZY) composite materials.

**
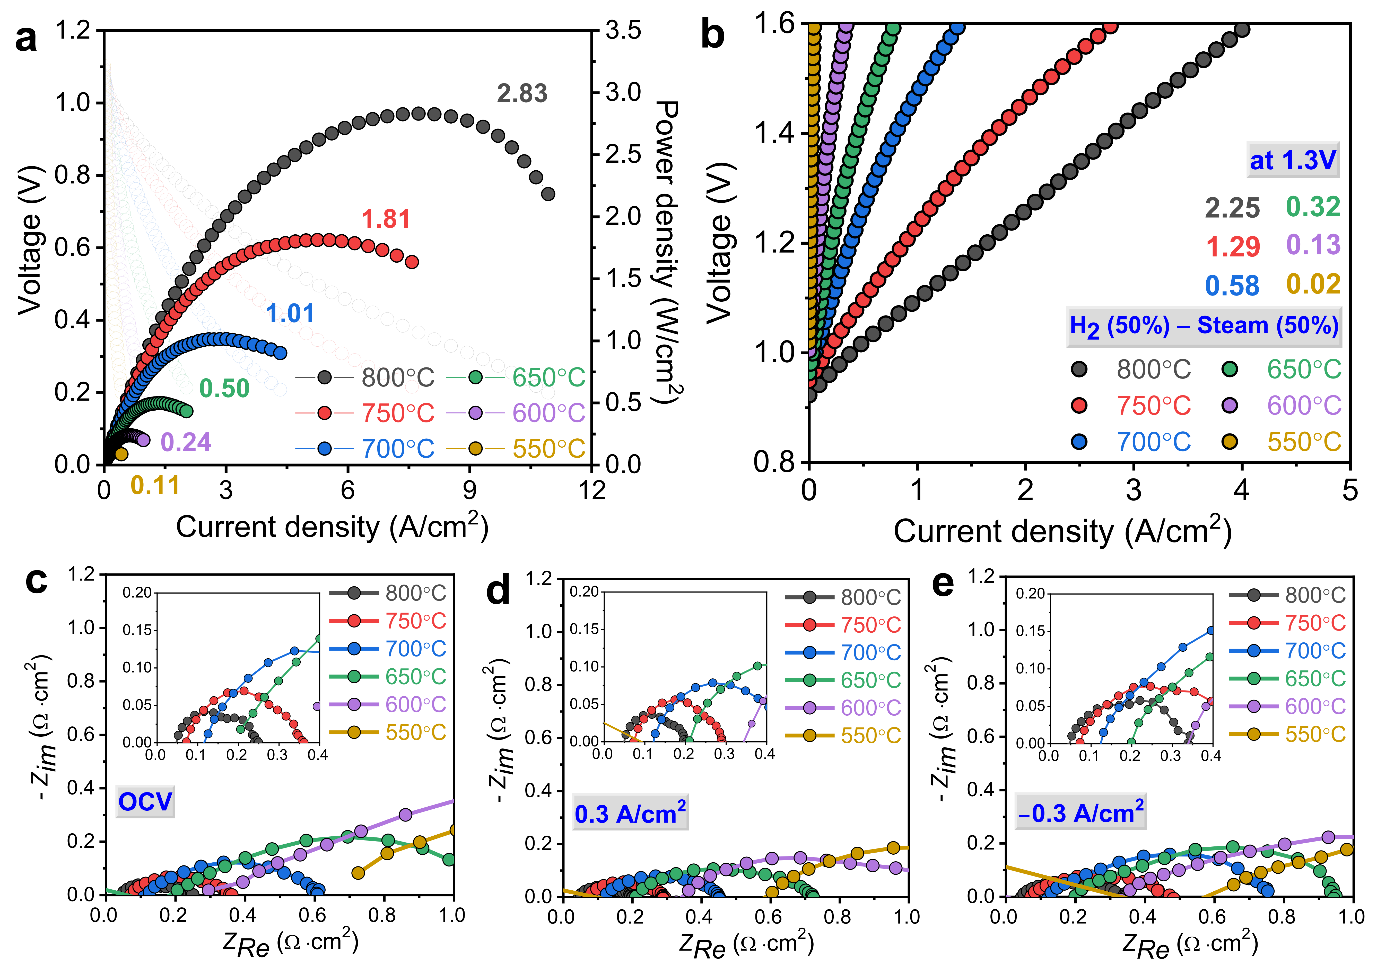
**

**Supplementary Figure 21. Electrochemical performances of PBSCF-GDC (6:4 wt.%) cell at 550‒800℃. a**, **b**,I-V-P characteristics in SOFC (**a**) and SOEC (**b**) modes. **c‒e**, Nyquist plots from EIS measurements under OCV (**c**), 0.3 A∙cm−2 (**d**), and ‒0.3 A∙cm−2 (**e**) conditions.

**
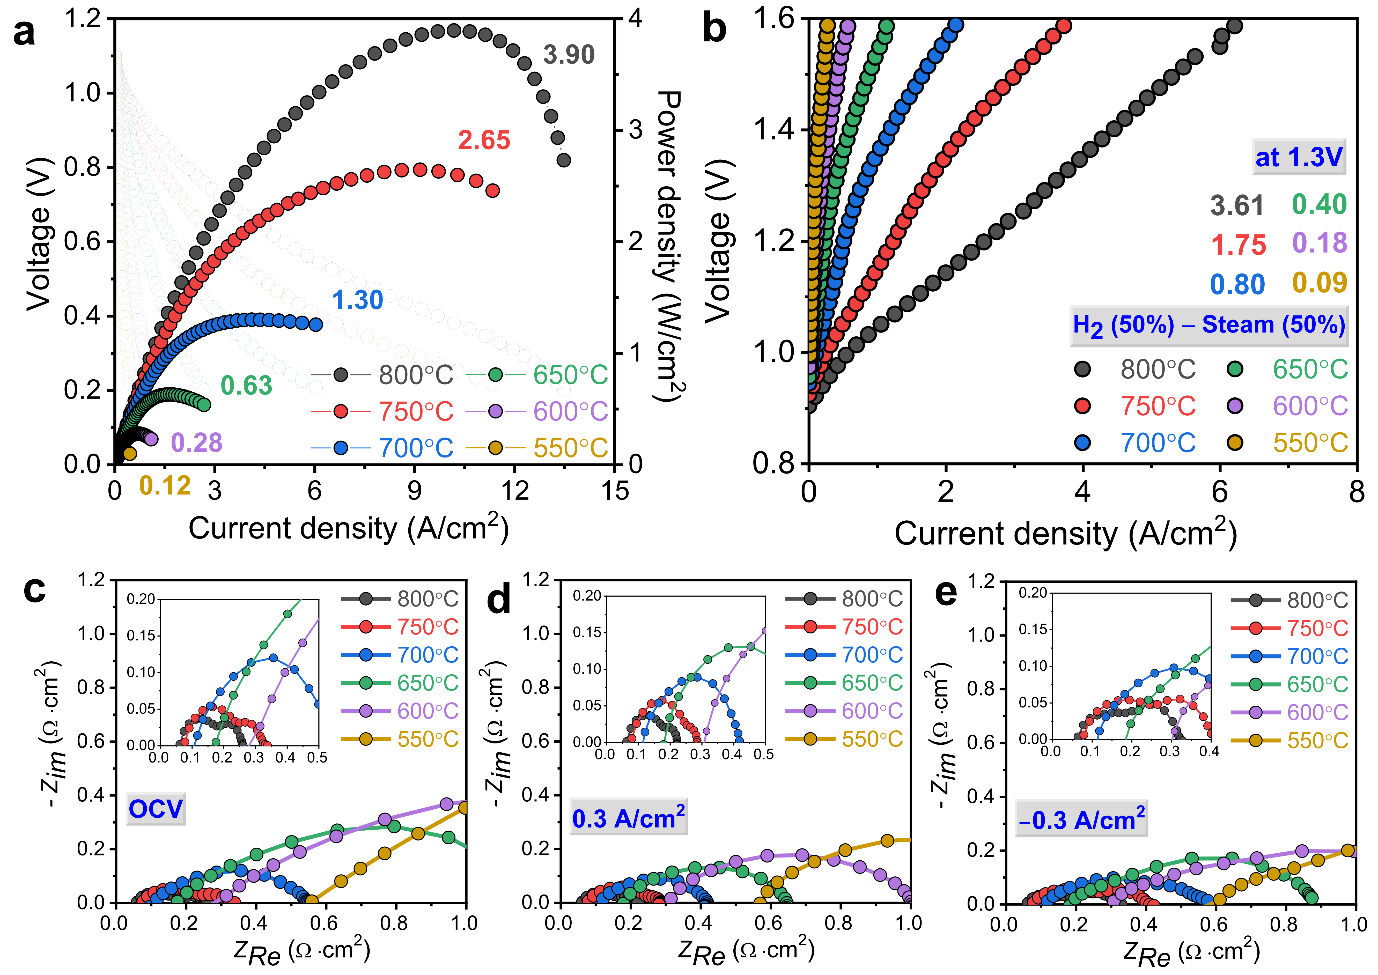
**

**Supplementary Figure 22. Electrochemical performances of PBSCF-BCZYYb7111 (6:4 wt.%) cell at 550‒800℃. a**, **b**, I-V-P characteristics in SOFC (**a**) and SOEC (**b**) modes. **c‒e**, Nyquist plots from EIS measurements under OCV (**c**), 0.3 A∙cm−2 (**d**), and ‒0.3 A∙cm−2 (**e**) conditions.

**
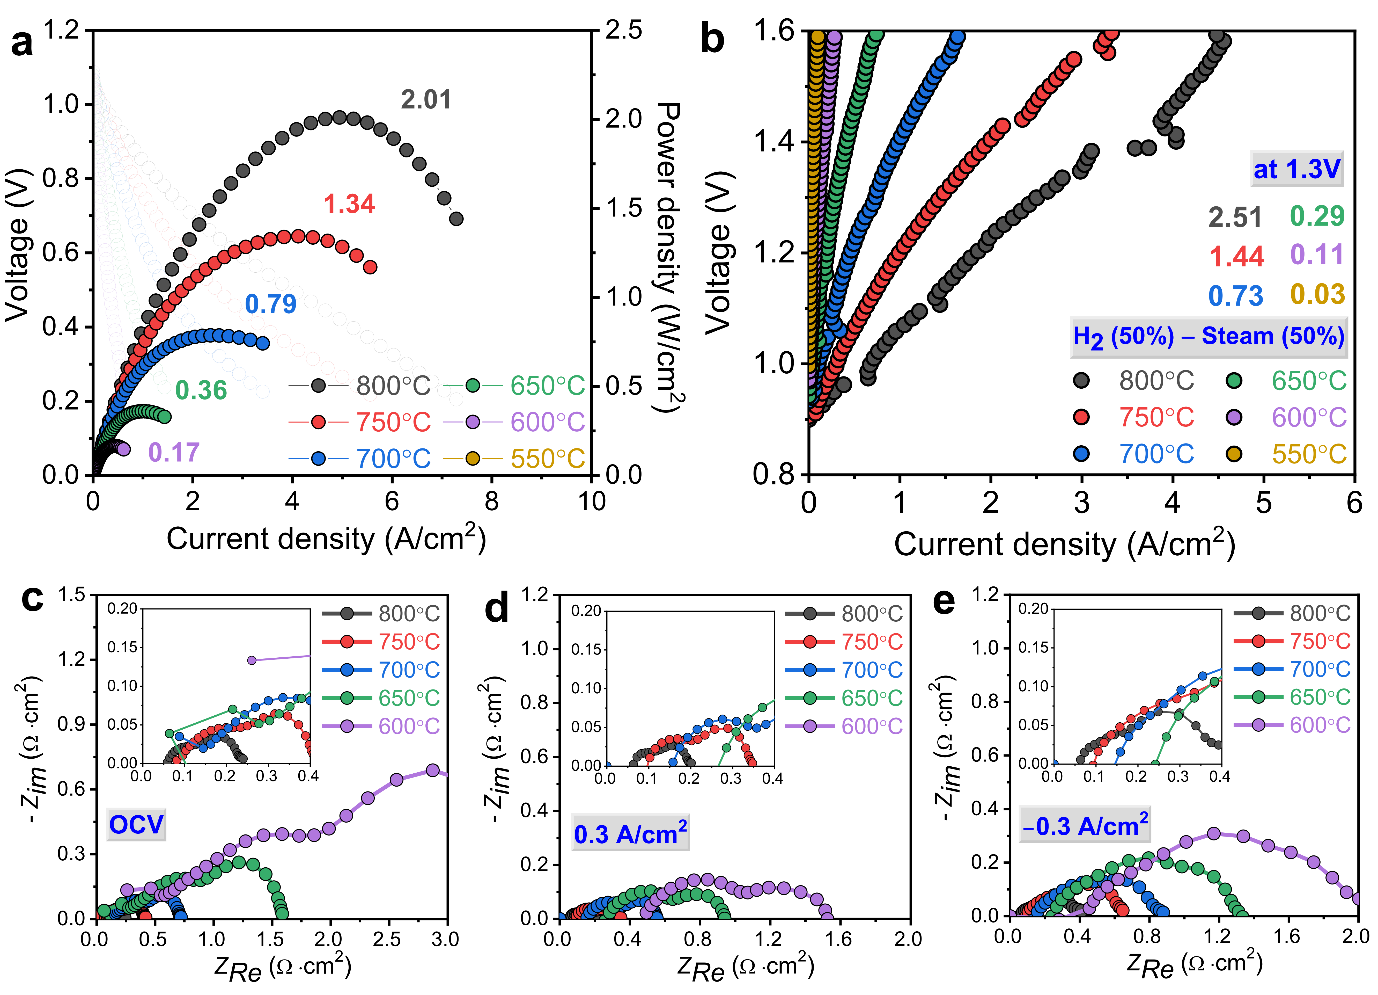
**

**Supplementary Figure 23. Electrochemical performances of LSC-GDC (6:4 wt.%) cell at 550‒800℃. a**, **b**,I-V-P characteristics in SOFC (**a**) and SOEC (**b**) modes. **c‒e**, Nyquist plots from EIS measurements under OCV (**c**), 0.3 A∙cm−2 (**d**), and ‒0.3 A∙cm−2 (**e**) conditions.

**
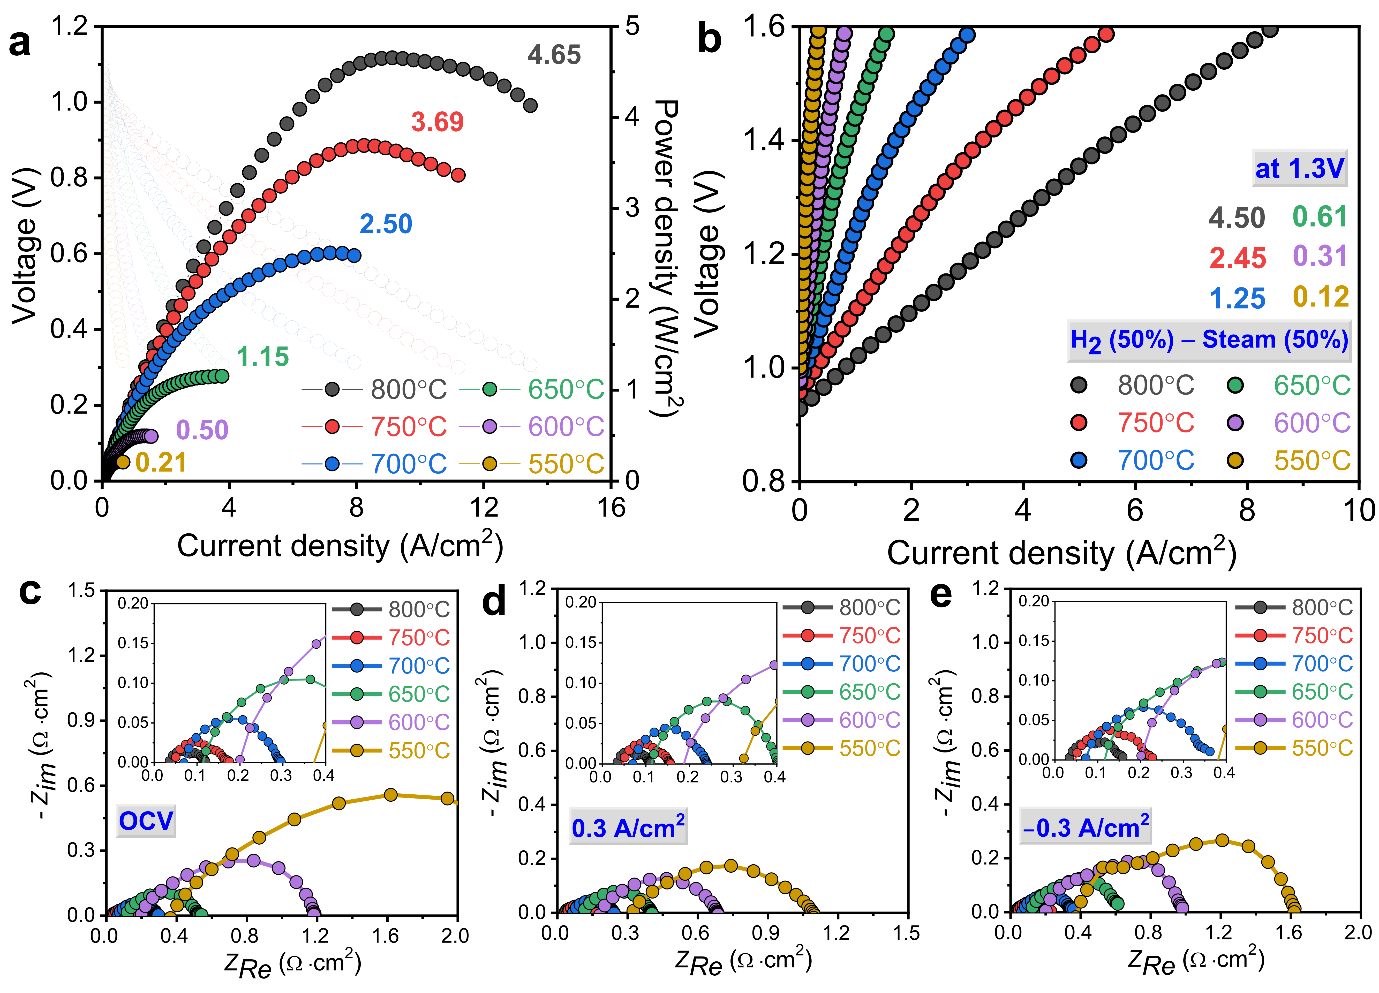
**

**Supplementary Figure 24. Electrochemical performances of LSC-BCZYYb7111 (6:4 wt.%) cell at 550‒800℃. a**, **b**,I-V-P characteristics in SOFC (**a**) and SOEC (**b**) modes. **c‒e**, Nyquist plots from EIS measurements under OCV (**c**), 0.3 A∙cm−2 (**d**), and ‒0.3 A∙cm−2 (**e**) conditions.

**
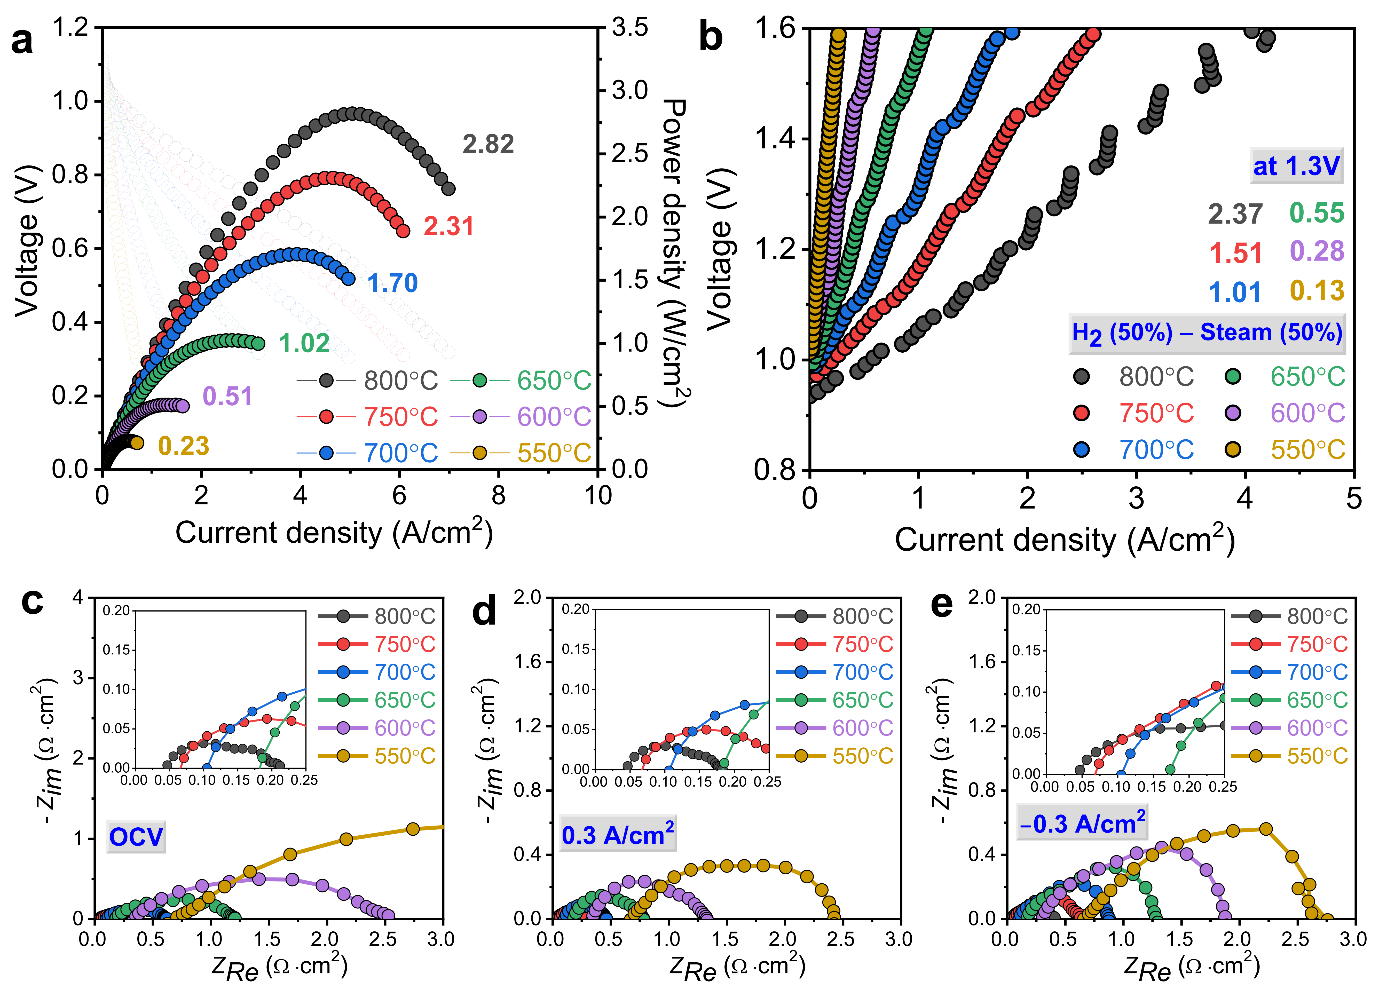
**

**Supplementary Figure 25. Electrochemical performances of BSCF-GDC (6:4 wt.%) cell at 550‒800℃. a**, **b**,I-V-P characteristics in SOFC (**a**) and SOEC (**b**) modes. **c‒e**, Nyquist plots from EIS measurements under OCV (**c**), 0.3 A∙cm−2 (**d**), and ‒0.3 A∙cm−2 (**e**) conditions.

**
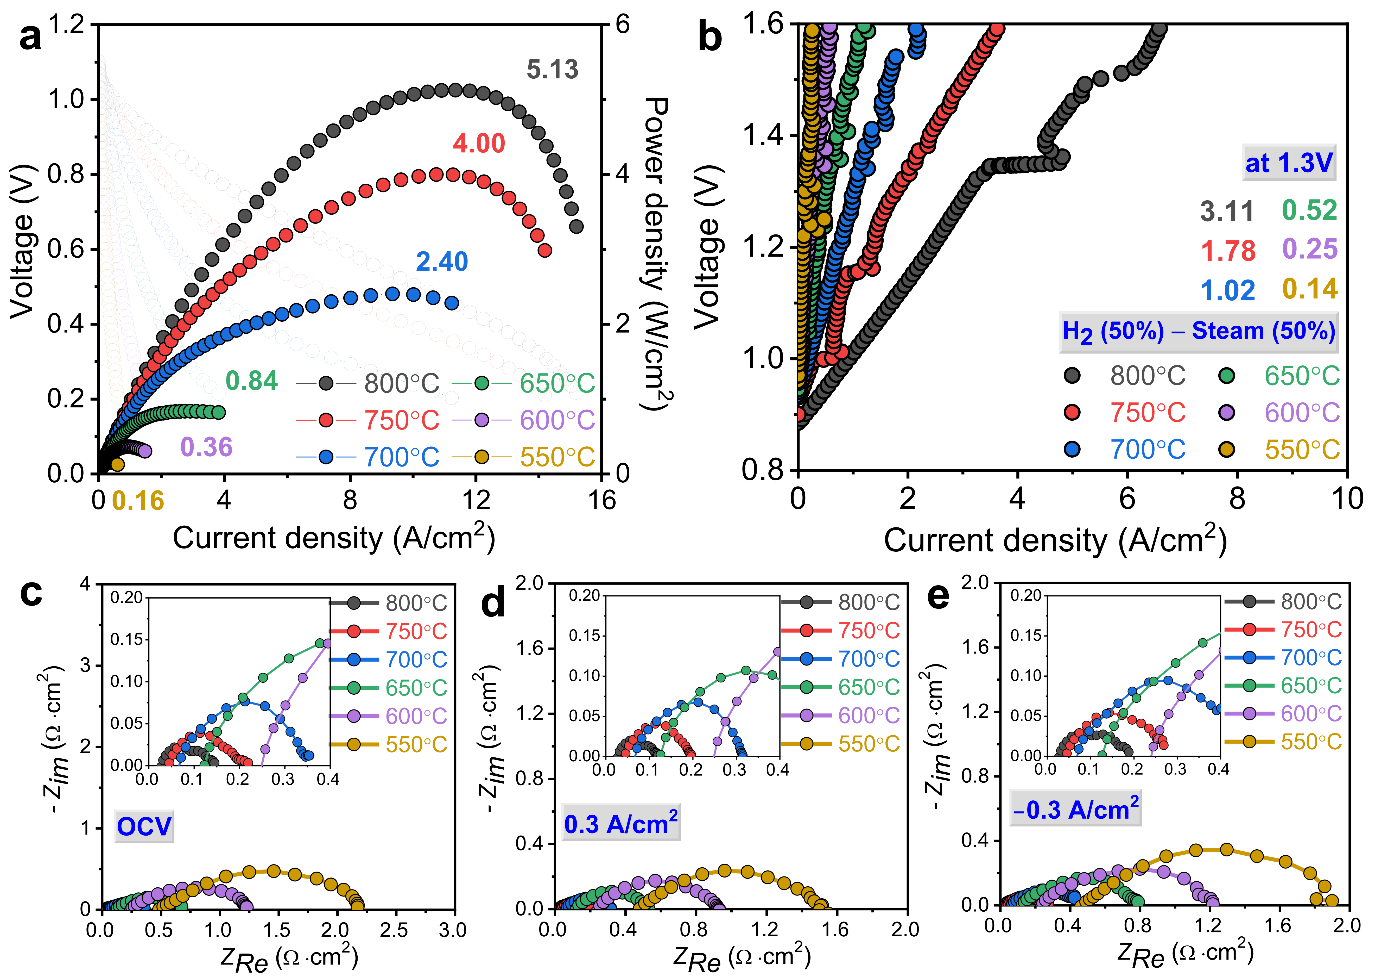
**

**Supplementary Figure 26. Electrochemical performances of BSCF-BCZYYb7111 (6:4 wt.%) cell at 550‒800℃. a**, **b**,I-V-P characteristics in SOFC (**a**) and SOEC (**b**) modes. **c‒e**, Nyquist plots from EIS measurements under OCV (**c**), 0.3 A∙cm−2 (**d**), and ‒0.3 A∙cm−2 (**e**) conditions.

**
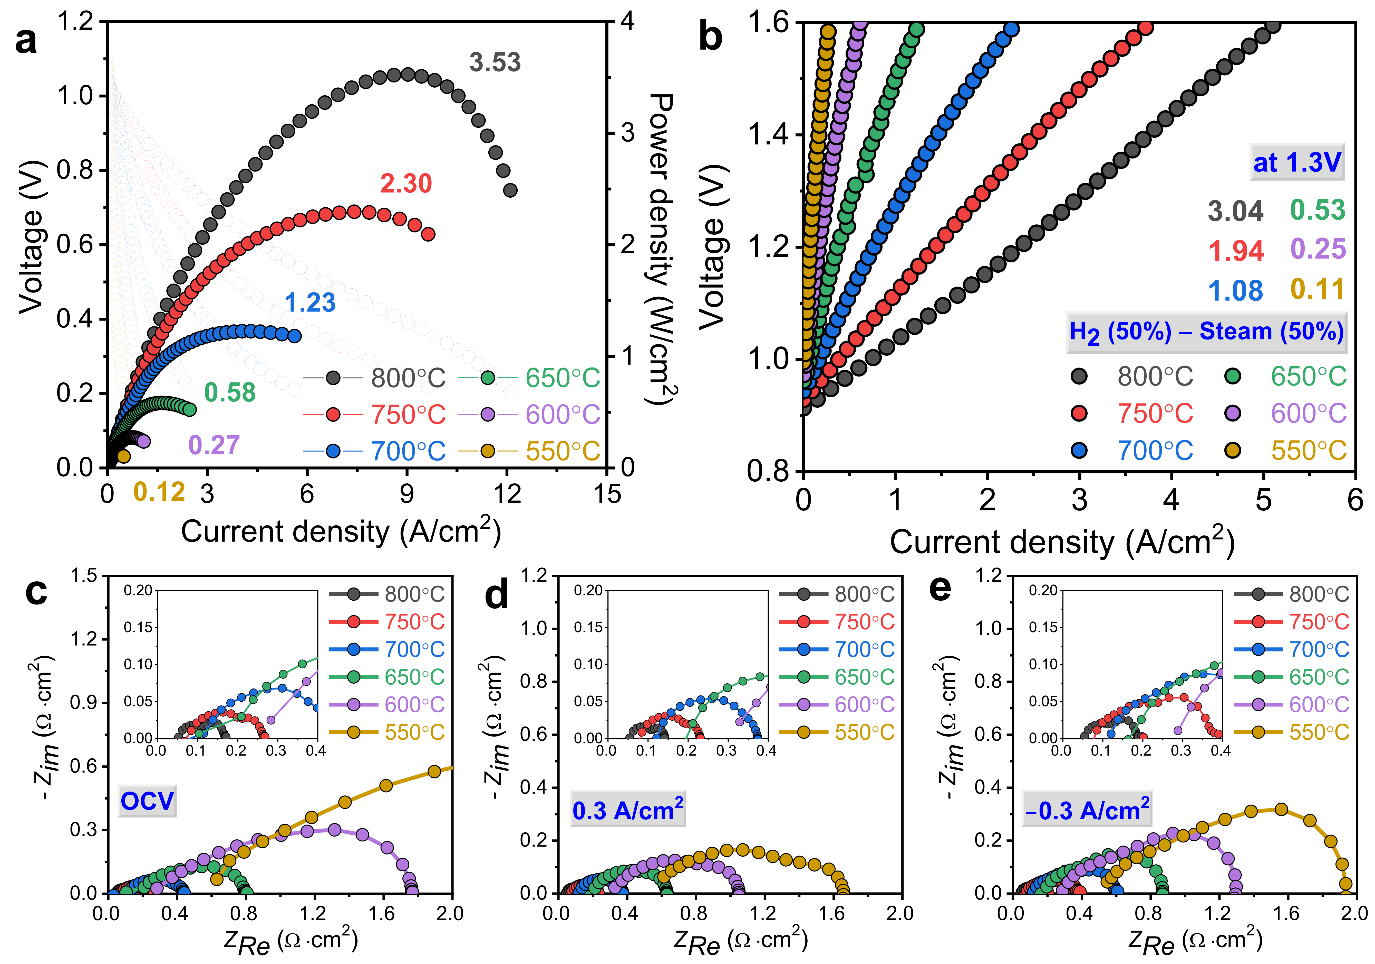
**

**Supplementary Figure 27. Electrochemical performances of LSCF-BCZYYb7111 (6:4 wt.%) cell at 550‒800℃. a**, **b**, I-V-P characteristics in SOFC (**a**) and SOEC (**b**) modes. **c‒e,** Nyquist plots from EIS measurements under OCV (**c**), 0.3 A∙cm−2 (**d**), and ‒0.3 A∙cm−2 (**e**) conditions.


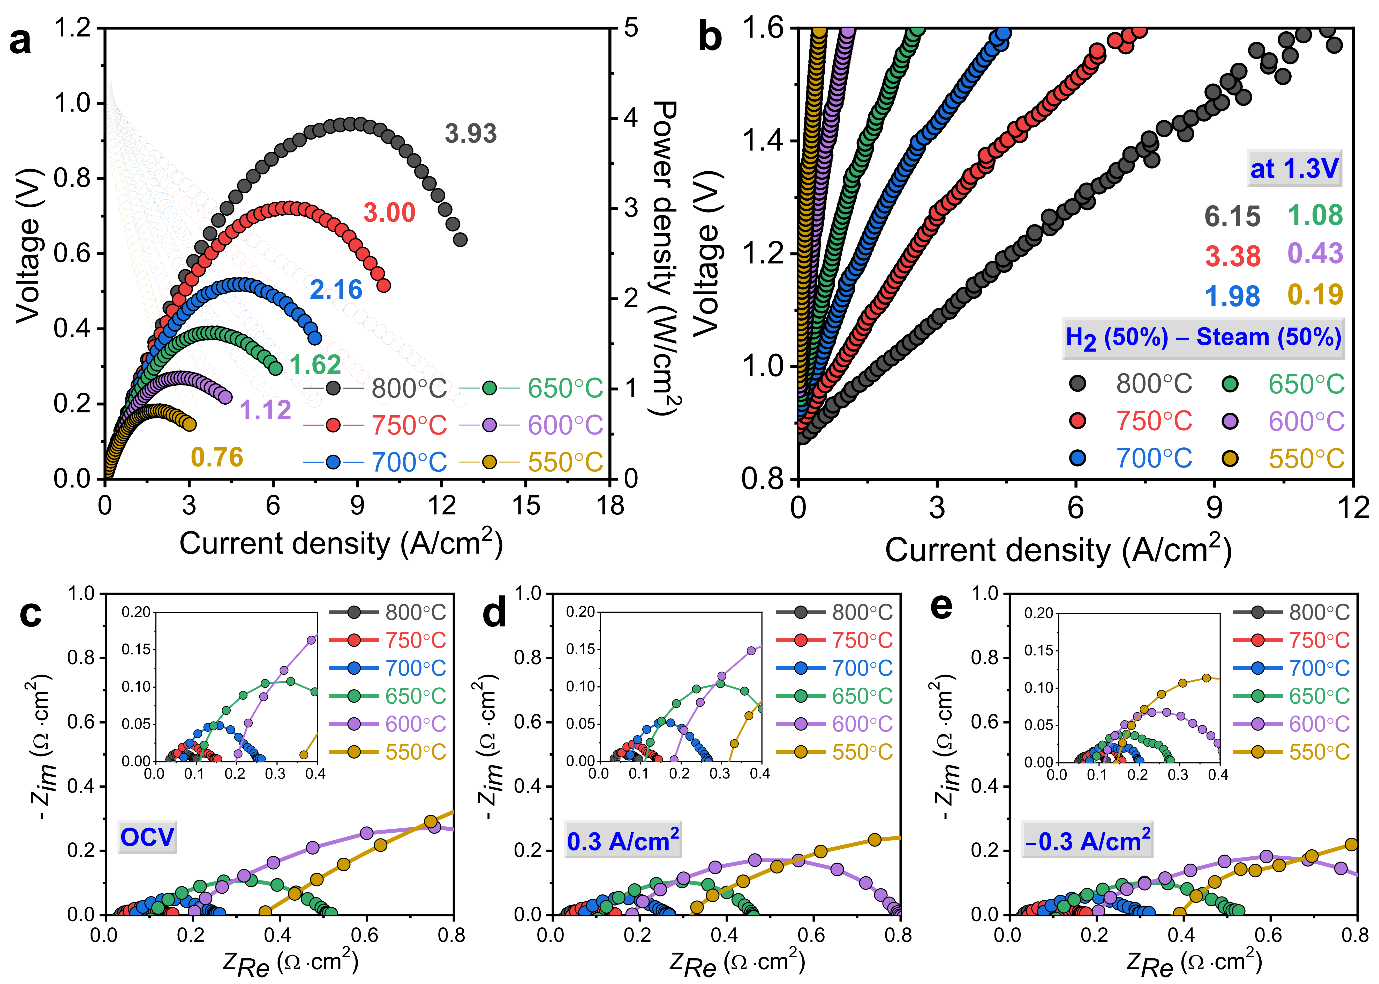


**Supplementary Figure 28. Electrochemical performances of GCCCO-BaCe0.9Y0.1O3−δ (BCY) (6:4 wt.%) cell at 550‒800℃. a**, **b**,I-V-P characteristics in SOFC (**a**) and SOEC (**b**) modes. **c‒e**, Nyquist plots from EIS measurements under OCV (**c**), 0.3 A∙cm−2 (**d**), and ‒0.3 A∙cm−2 (**e**) conditions.

**
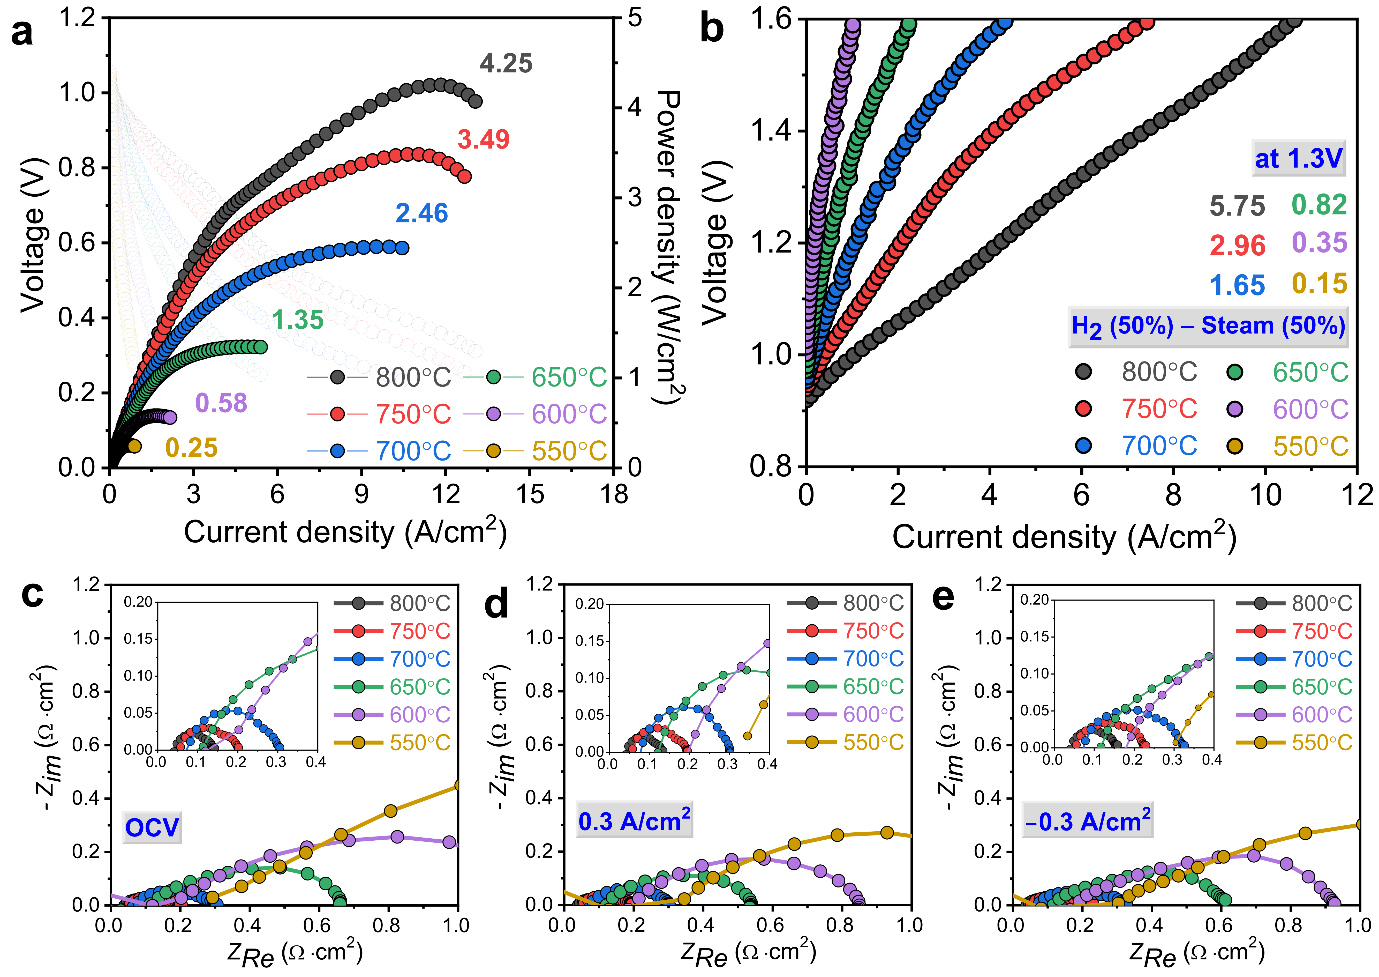
**

**Supplementary Figure 29. Electrochemical performances of GCCCO-BaZr0.9Y0.1O3−δ (BZY) (6:4 wt.%) cell at 550‒800℃. a**, **b**,I-V-P characteristics in SOFC (**a**) and SOEC (**b**) modes. **c‒e**, Nyquist plots from EIS measurements under OCV (**c**), 0.3 A∙cm−2 (**d**), and ‒0.3 A∙cm−2 (**e**) conditions.

**
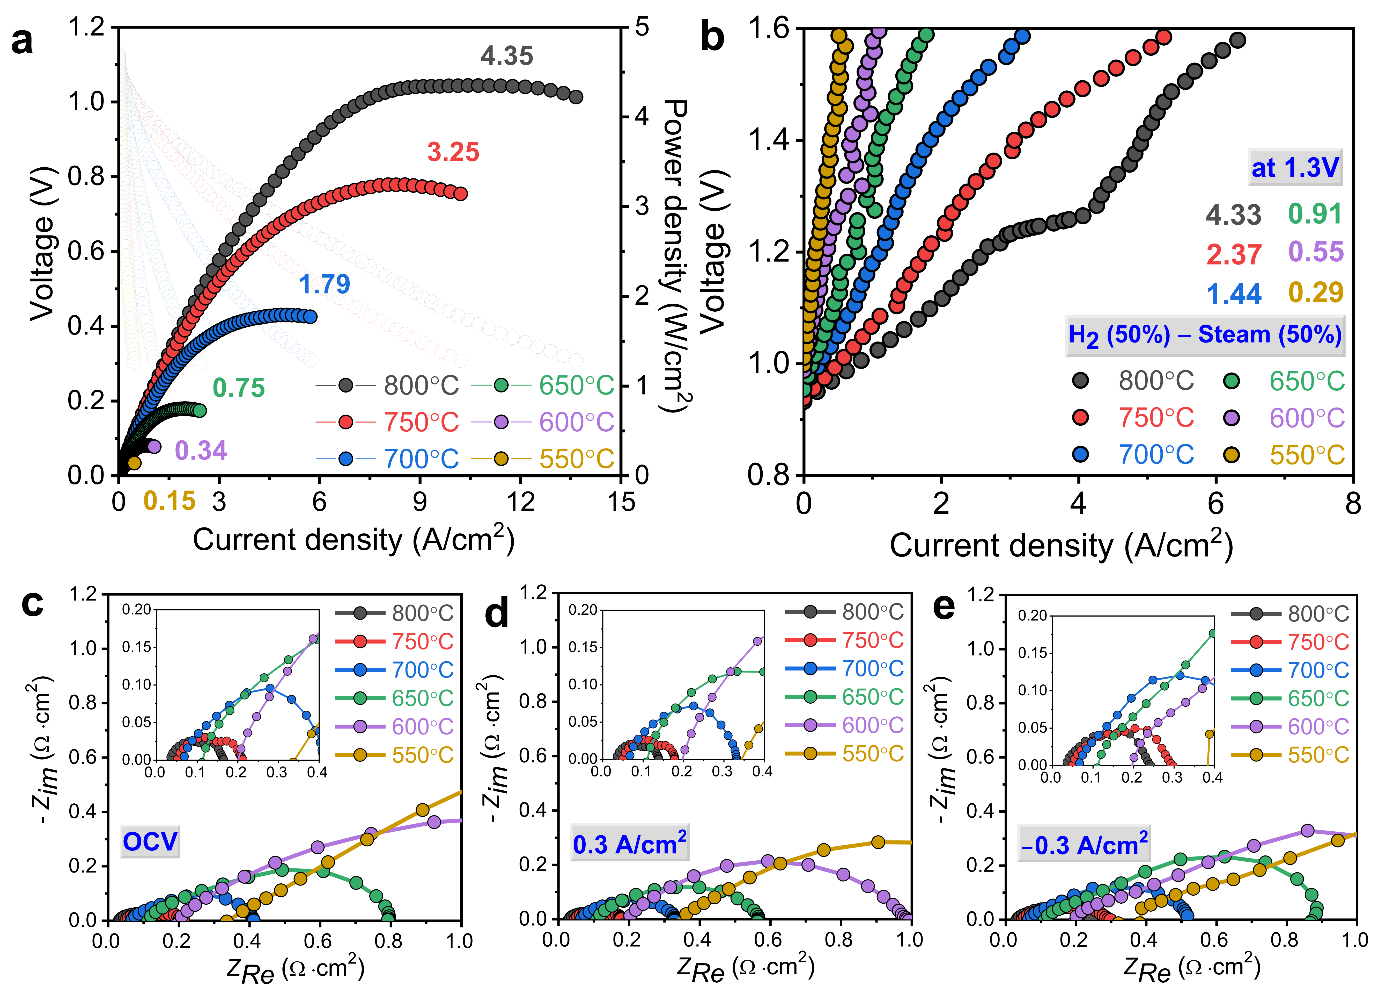
**

**Supplementary Figure 30. Electrochemical performances of GCCCO-BaCe0.7Zr0.1Y0.2O3−δ (BCZY) (6:4 wt.%) cell at 550‒800℃. a**, **b**,I-V-P characteristics in SOFC (**a**) and SOEC (**b**) modes. **c‒e**, Nyquist plots from EIS measurements under OCV (**c**), 0.3 A∙cm−2 (**d**), and ‒0.3 A∙cm−2 (**e**) conditions.

**
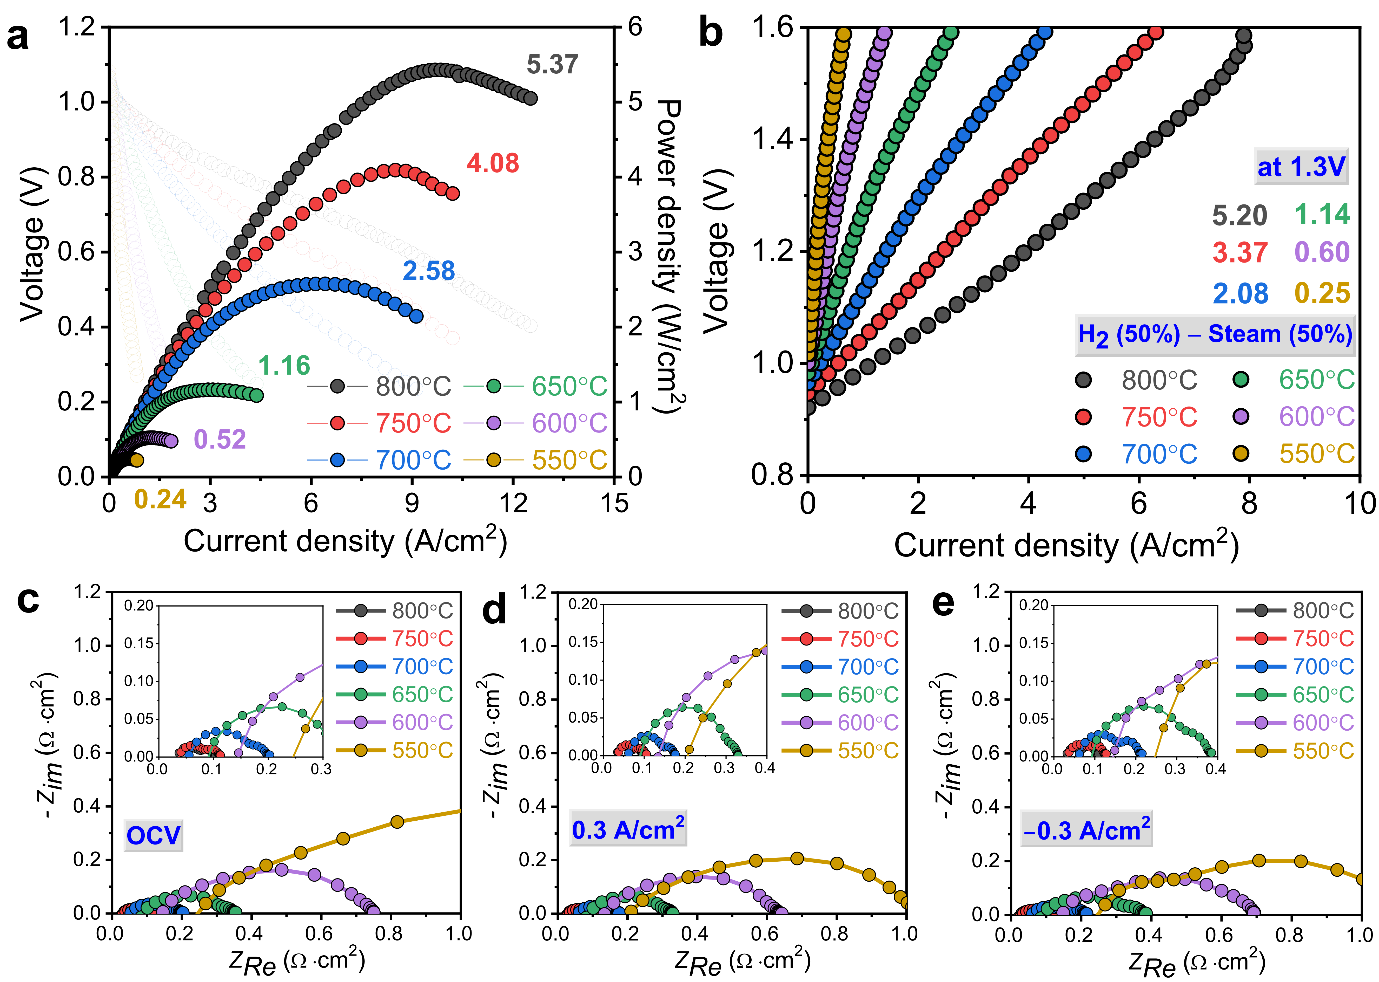
**

**Supplementary Figure 31. Electrochemical performances of GCCCO-BCZYYb4411 (6:4 wt.%) cell at 550‒800℃. a**, **b**, I-V-P characteristics in SOFC (**a**) and SOEC (**b**) modes. **c‒e**, Nyquist plots from EIS measurements under OCV (**c**), 0.3 A∙cm−2 (**d**), and ‒0.3 A∙cm−2 (**e**) conditions.

**
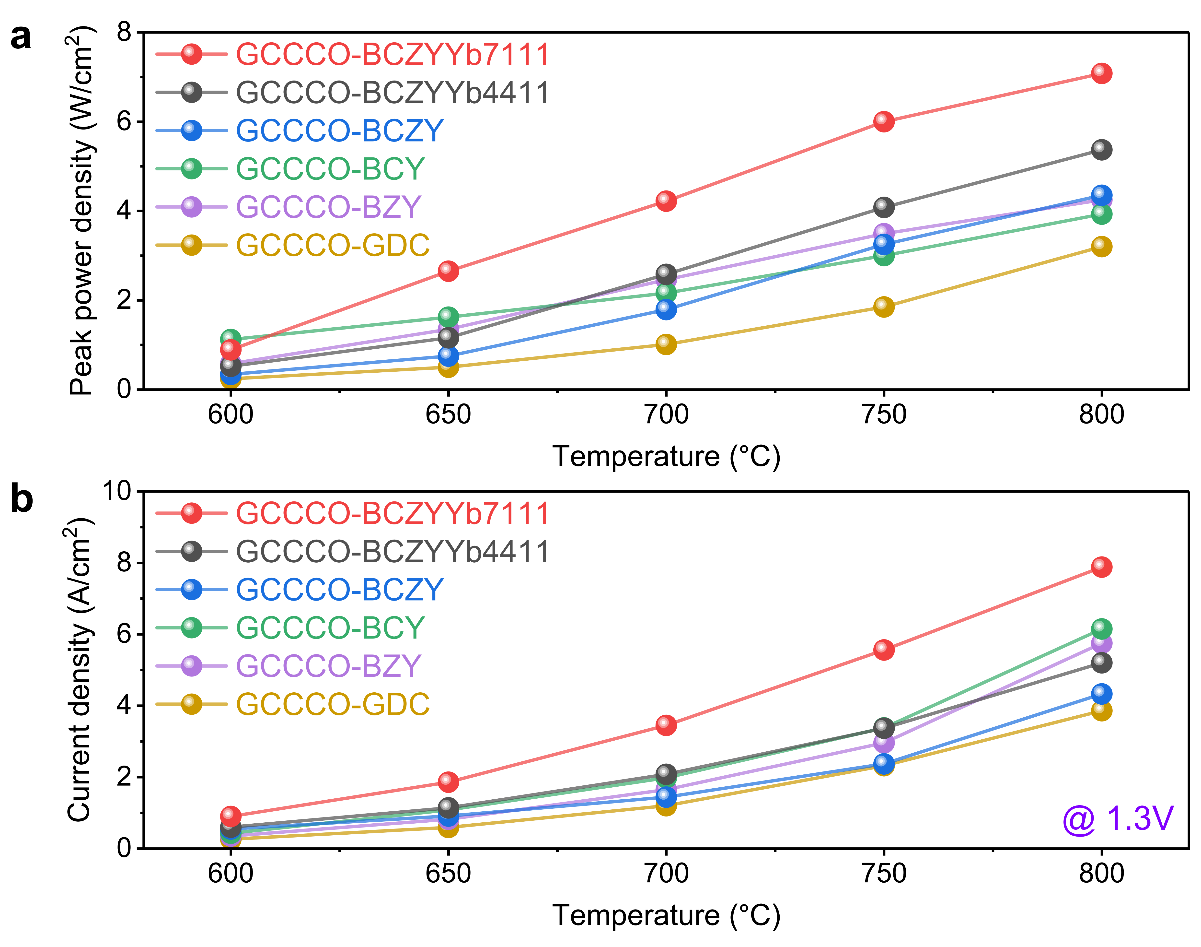
**

**Supplementary Figure 32. Peak power density and current density performance of various composite GCCCO air electrode materials on NiO-YSZ supported cells at 650‒800℃. a**,Peak power density in SOFC mode **b**, Current density at 1.3V in SOEC mode.

**
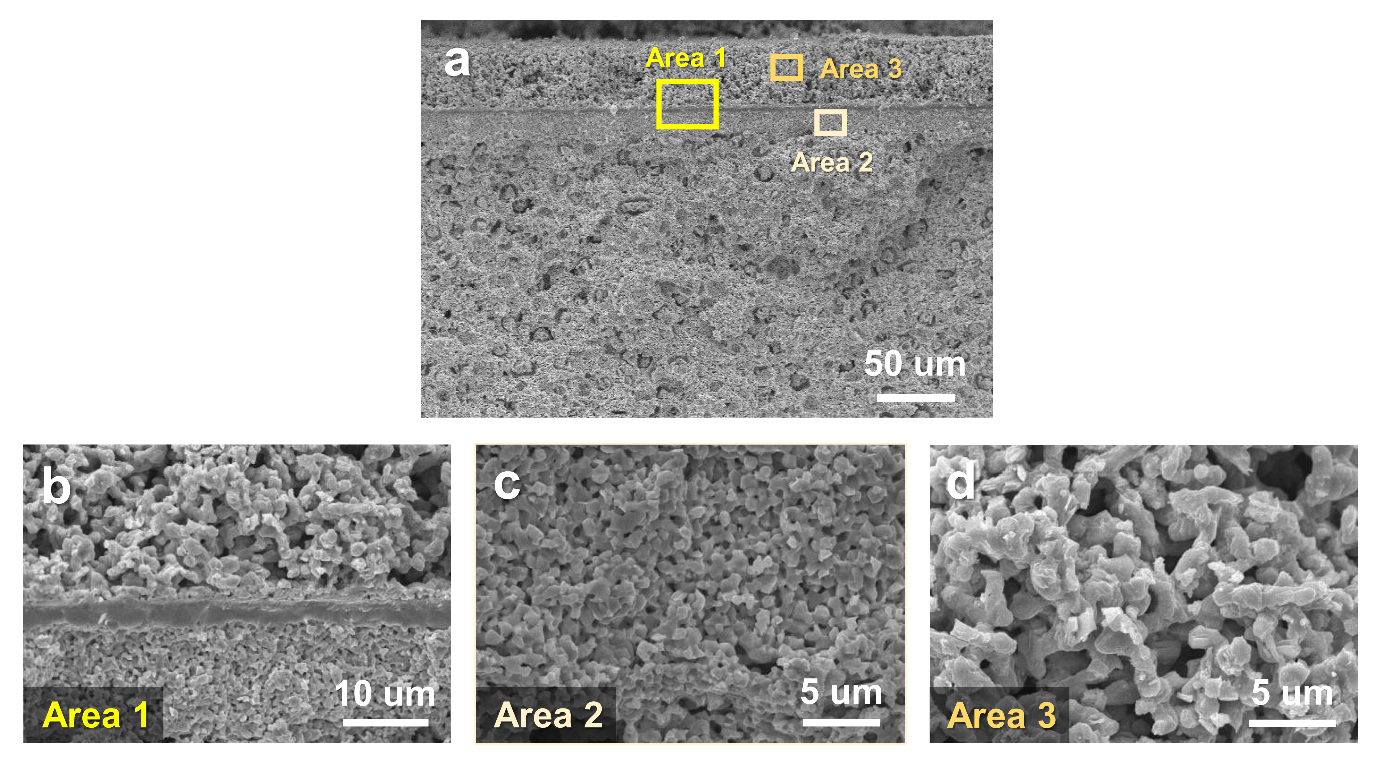
**

**Supplementary Figure 33. Microstructural FE-SEM analysis of GCCCO-BCZYYb7111 cells after long-term reversible operation. a**, Cross-section of the cell (low magnification). **b**, Area 1 (cross-section of the cell at high magnification). **c**, Area 2 (AFL area). **d**, Area 3 (air electrode area).

**
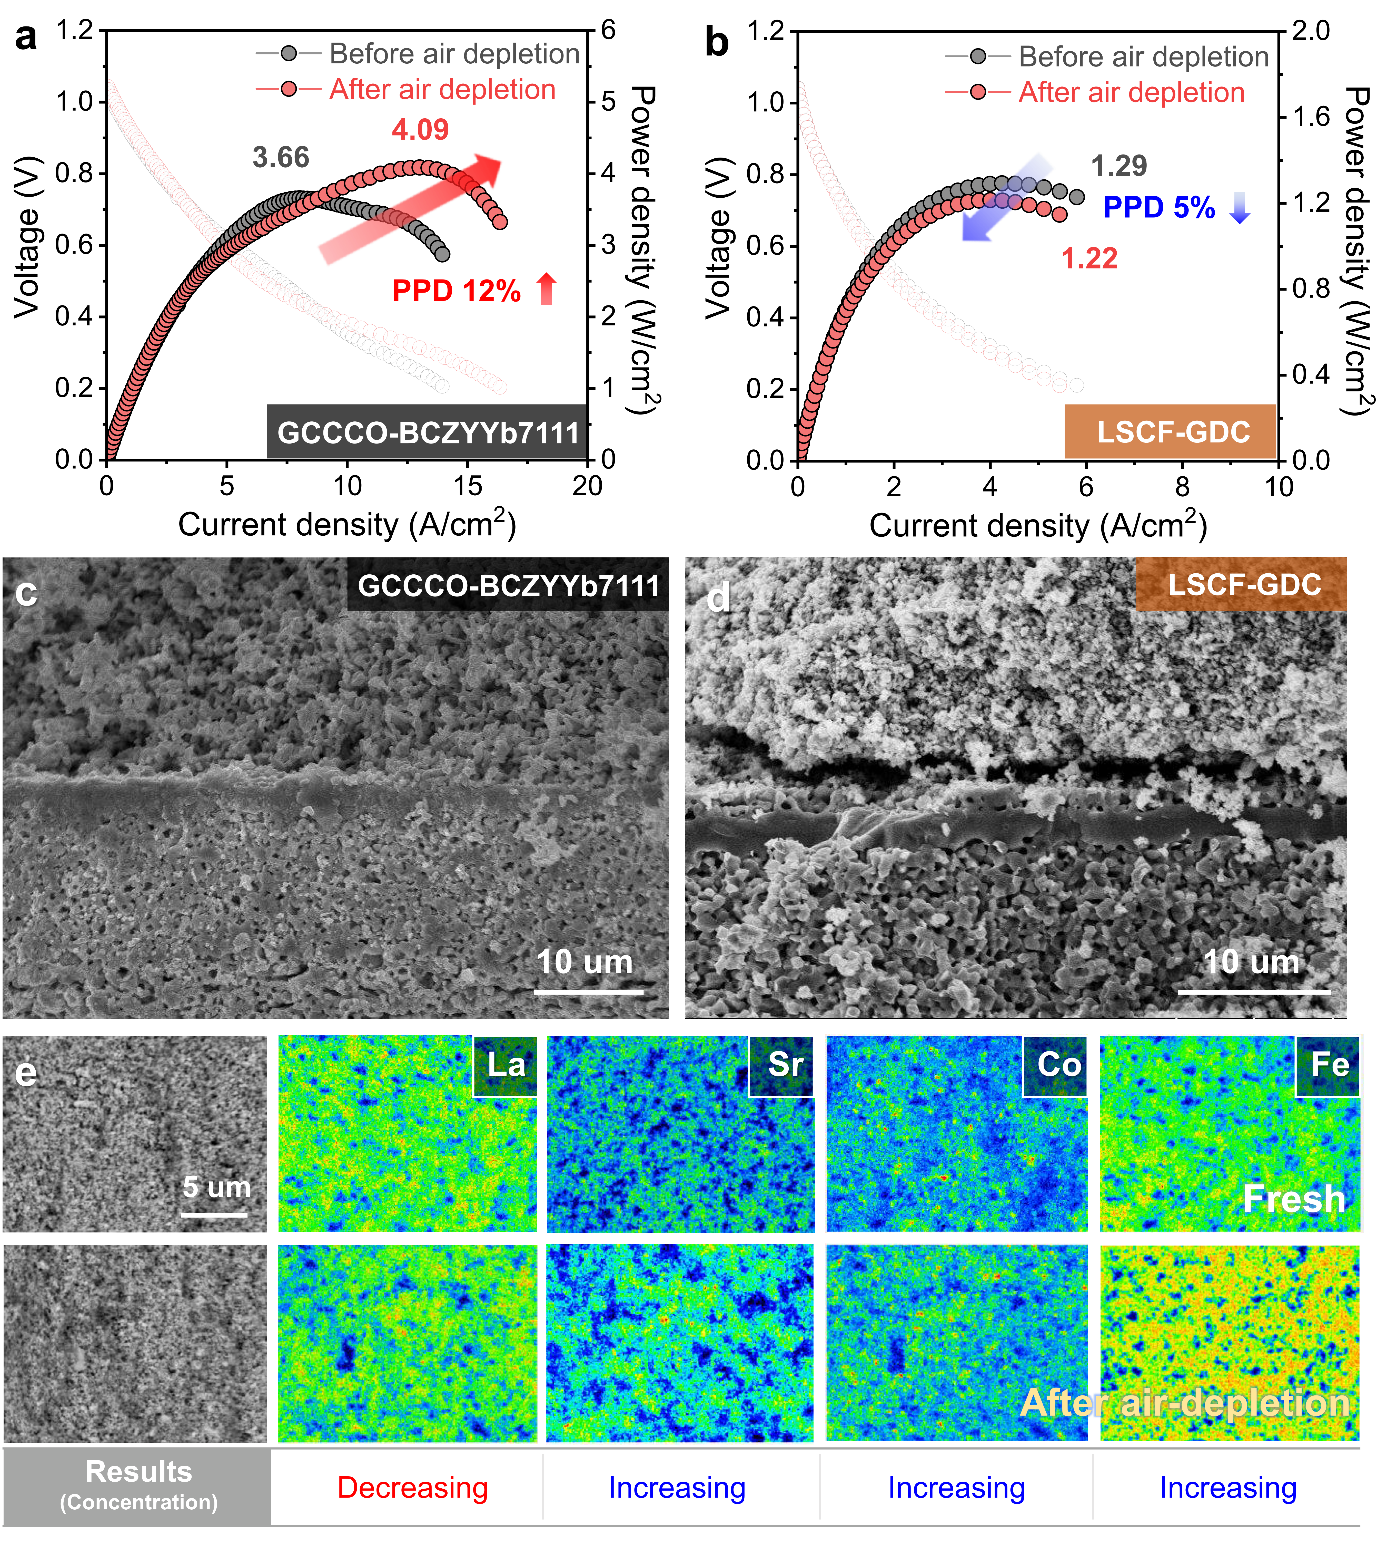
**

**Supplementary Figure 34. Electrochemical and microstructural analysis before/after air-depletion tests. a, b,** Change of I-V curve of GCCCO-BCZYYb7111 (a) and LSCF-GDC cathode (b)**. c, d,** SEM images after air-depletion test of GCCCO-BCZYYb7111(a) and LSCF-GDC air electrode (b)**. e,** SEM-EPMA analyses of La, Sr, Co and Fe from LSCF-GDC air electrode before/after air-depletion test.

**
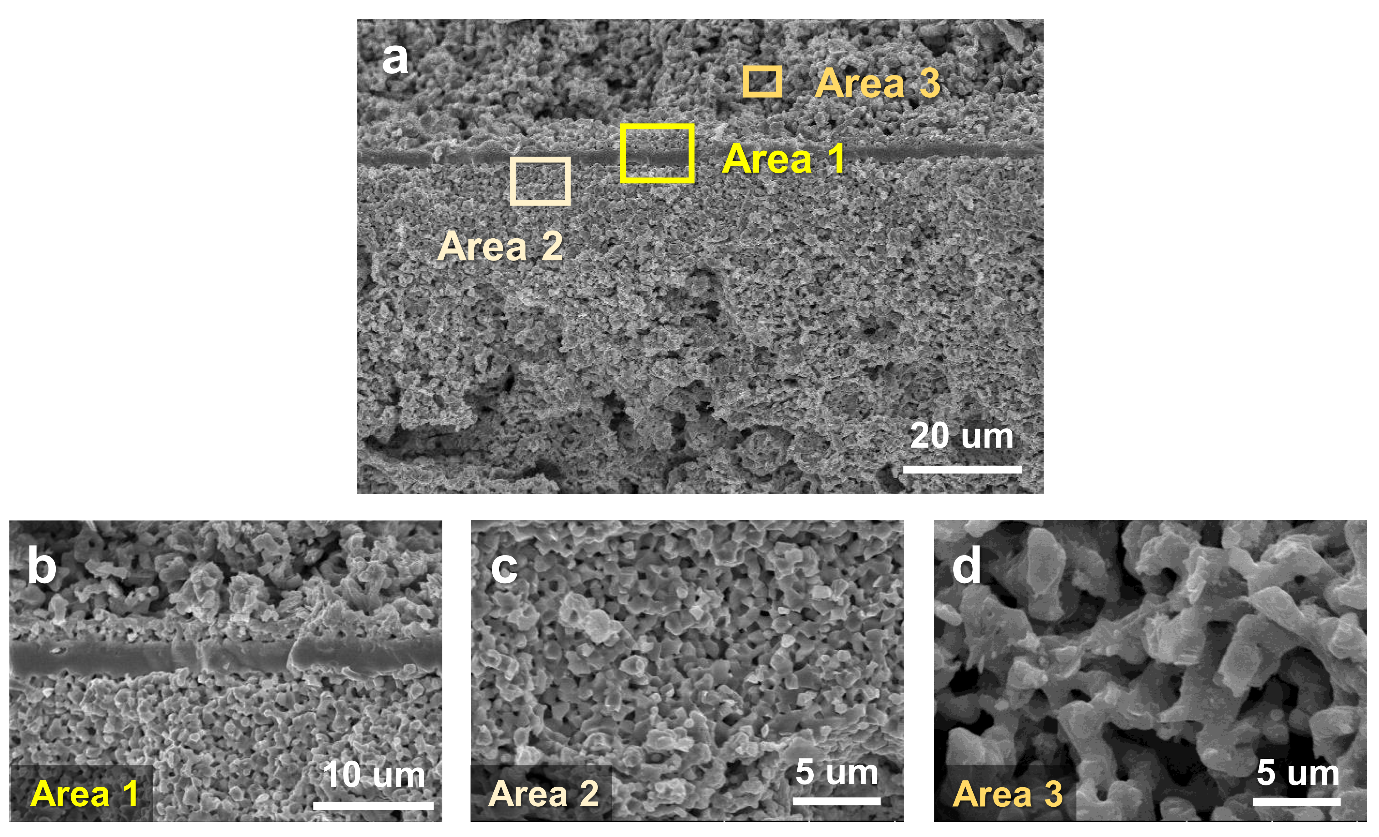
**

**Supplementary Figure 35. Microstructural FE-SEM analysis of GCCCO-BCZYYb7111 cells after thermal-cycling. a**, Cross-section of the cell (low magnification). **b**, Area 1 (cross-section of the cell at high magnification). **c**, Area 2 (AFL area). **d**, Area 3 (air electrode area).

**
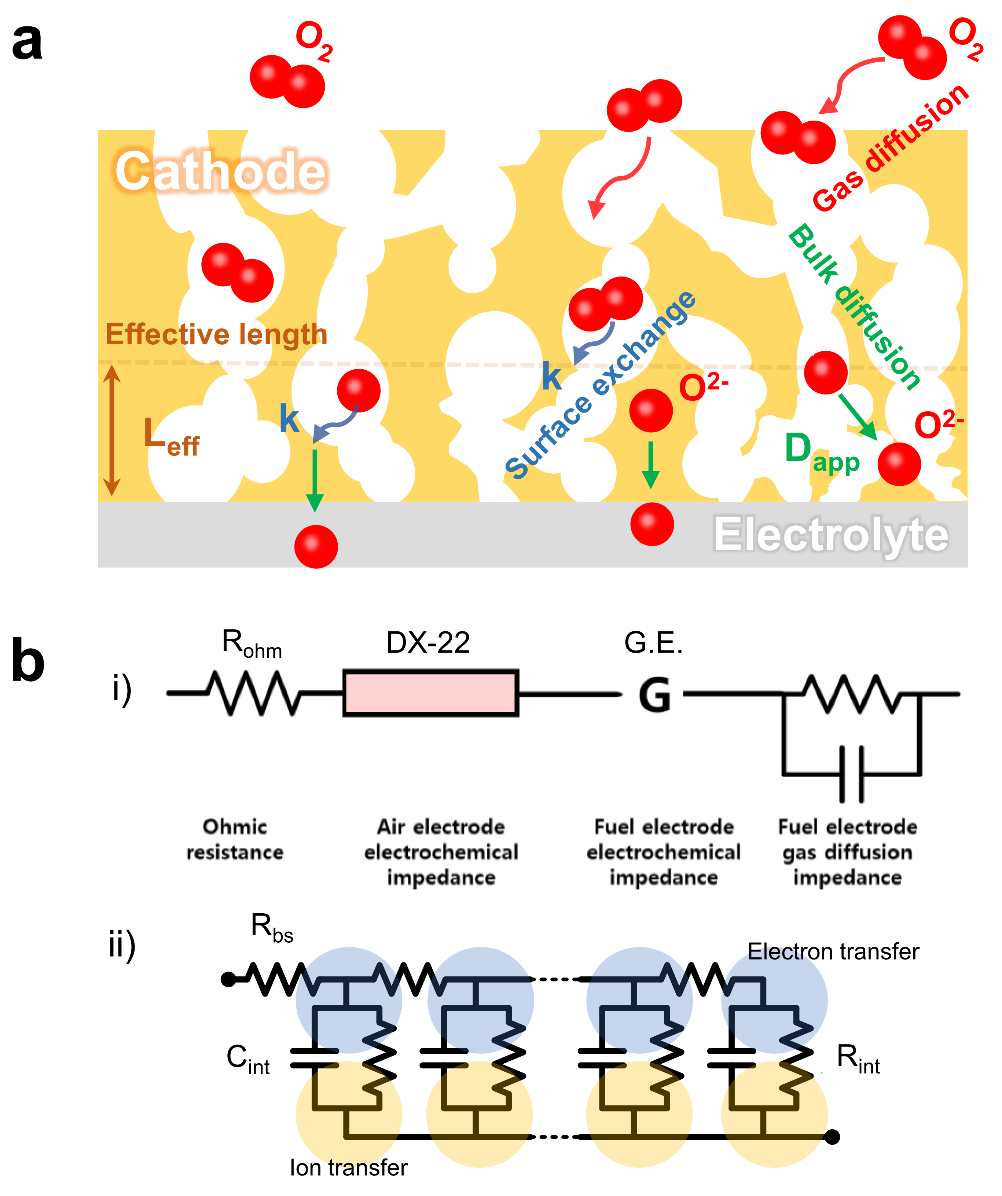
**

**Supplementary Figure 36. Transmission line model (TLM) analysis of EIS data of air-electrode in SOFC mode. a**,Schematic illustration of the oxygen reduction reaction at the air electrode. **b**,Bisquert model (DX-22) (i)andequivalent circuit model for transmission line fitting (ii).

**
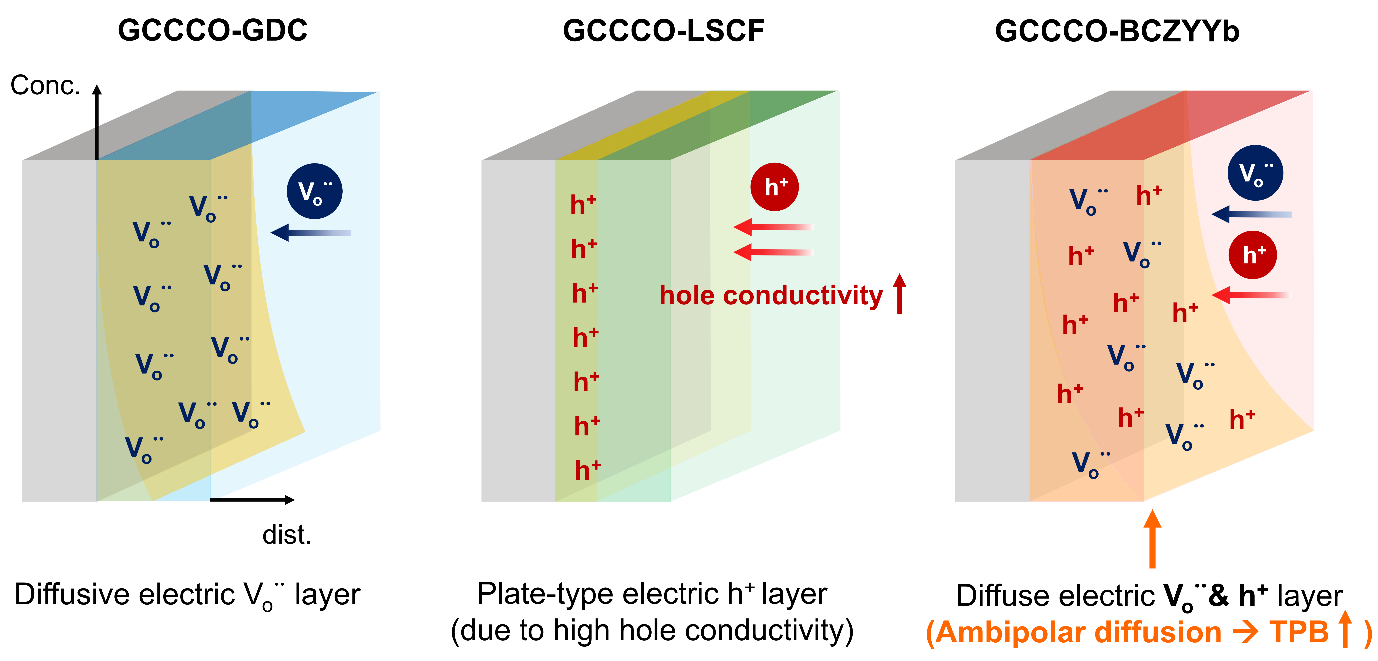
**

**Supplementary Figure 37. A schematic diagram illustrating the oxygen ion and electron/hole concentration profiles that develop at the electric double-layer interface between GCCCO-GDC, GCCCO-LSCF, and GCCCO-BCZYYb.**

**
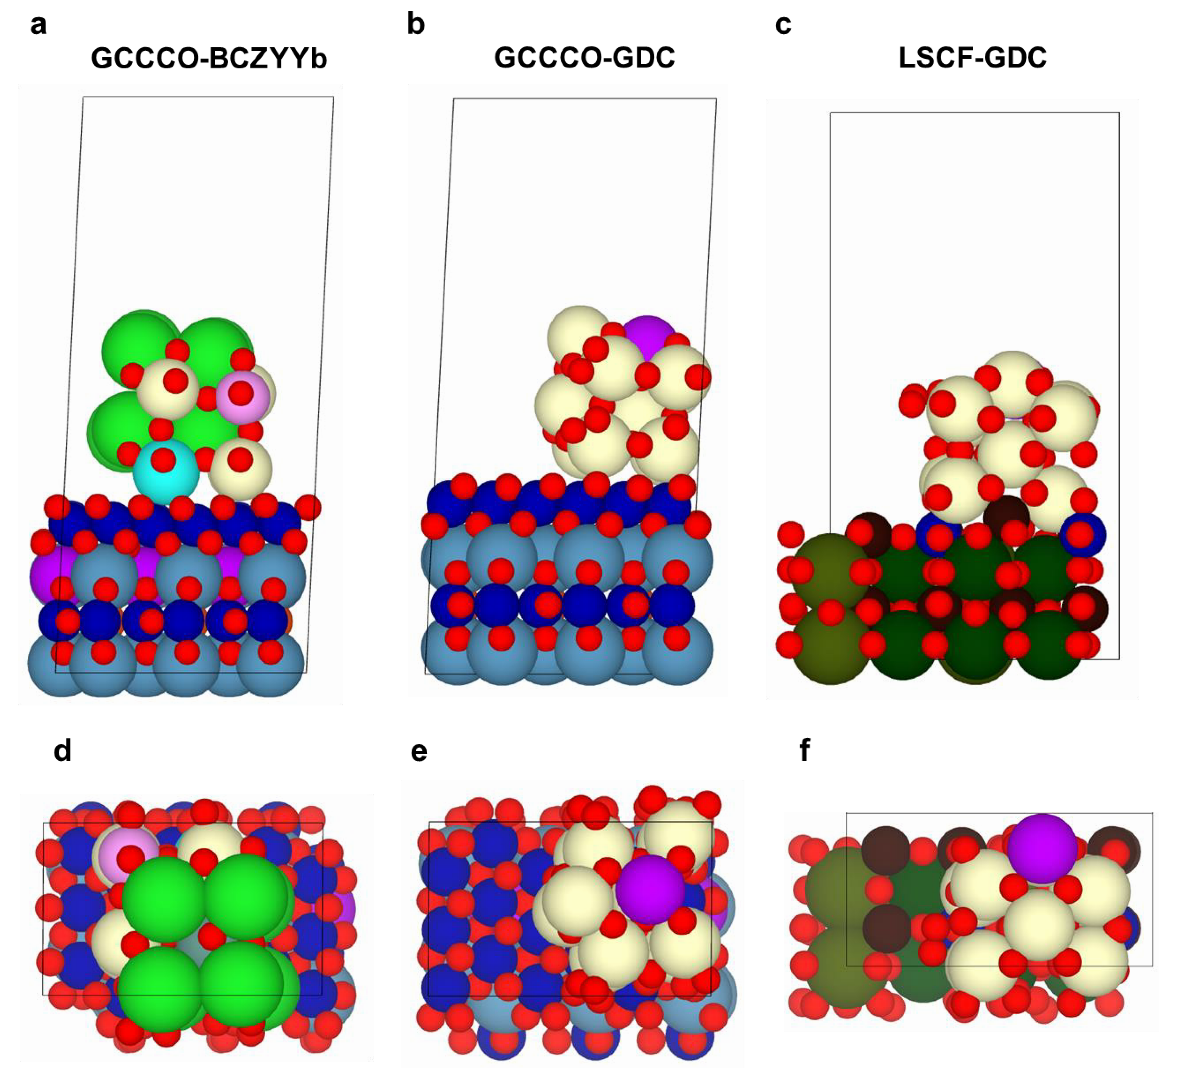
**

**Supplementary Figure 38. DFT-optimized surface structures of composite air electrode materials. a,** GCCCO-BCZYYb. **b**, GCCCO-GDC. **c**, LSCF-GDC (side view). **d,** GCCCO-BCZYYb. **e,** GCCCO-GDC. **f,** LSCF-GDC (top view).

**
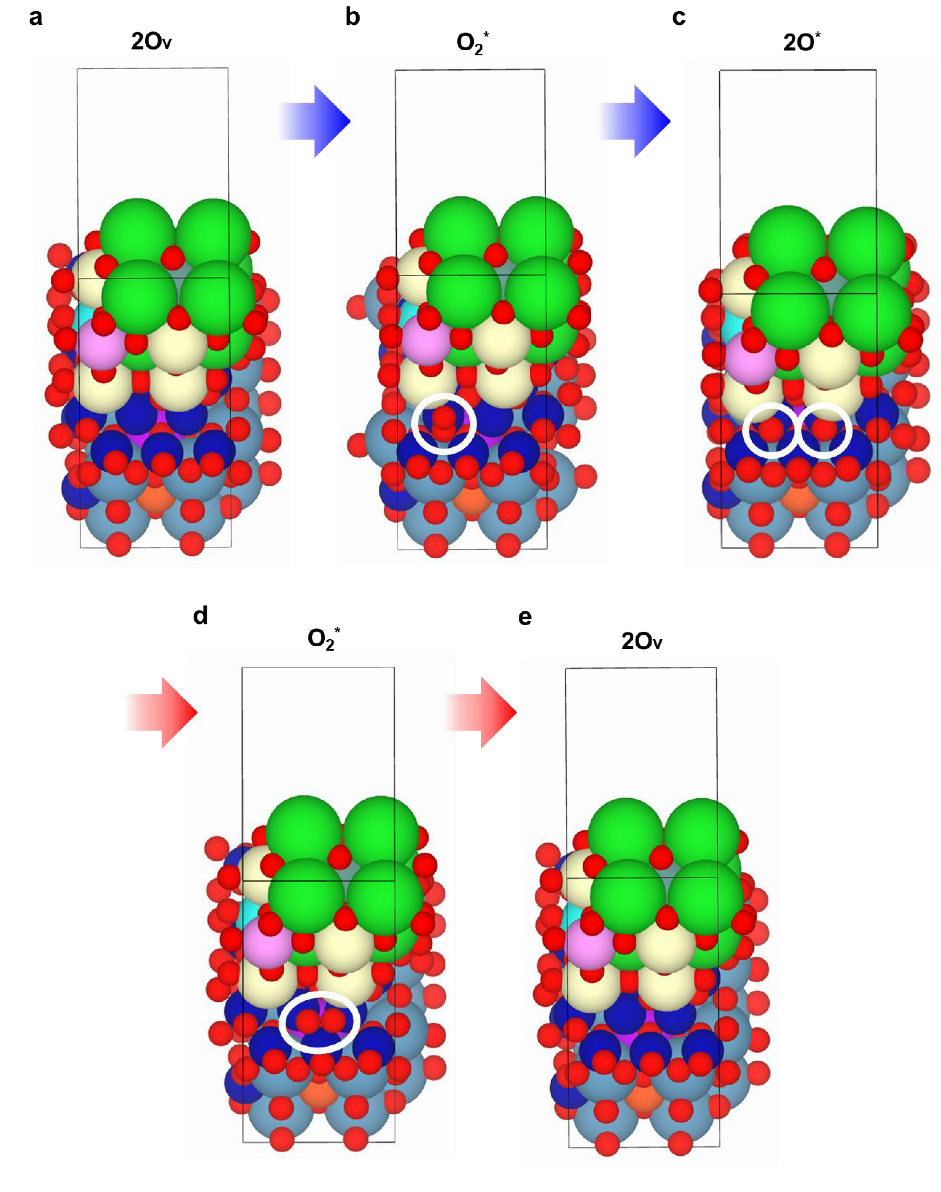
**

**Supplementary Figure 39. DFT-optimized reaction intermediate configurations for oxygen exchange reaction on GCCCO-BCZYYb**. **a,** slab with two oxygen vacancies. **b**, incorporated oxygen molecule. **c**, incorporated two oxygen atoms from dissociated oxygen molecule. **d,** associated oxygen atoms. **e,** slab with two oxygen vacancies.

**
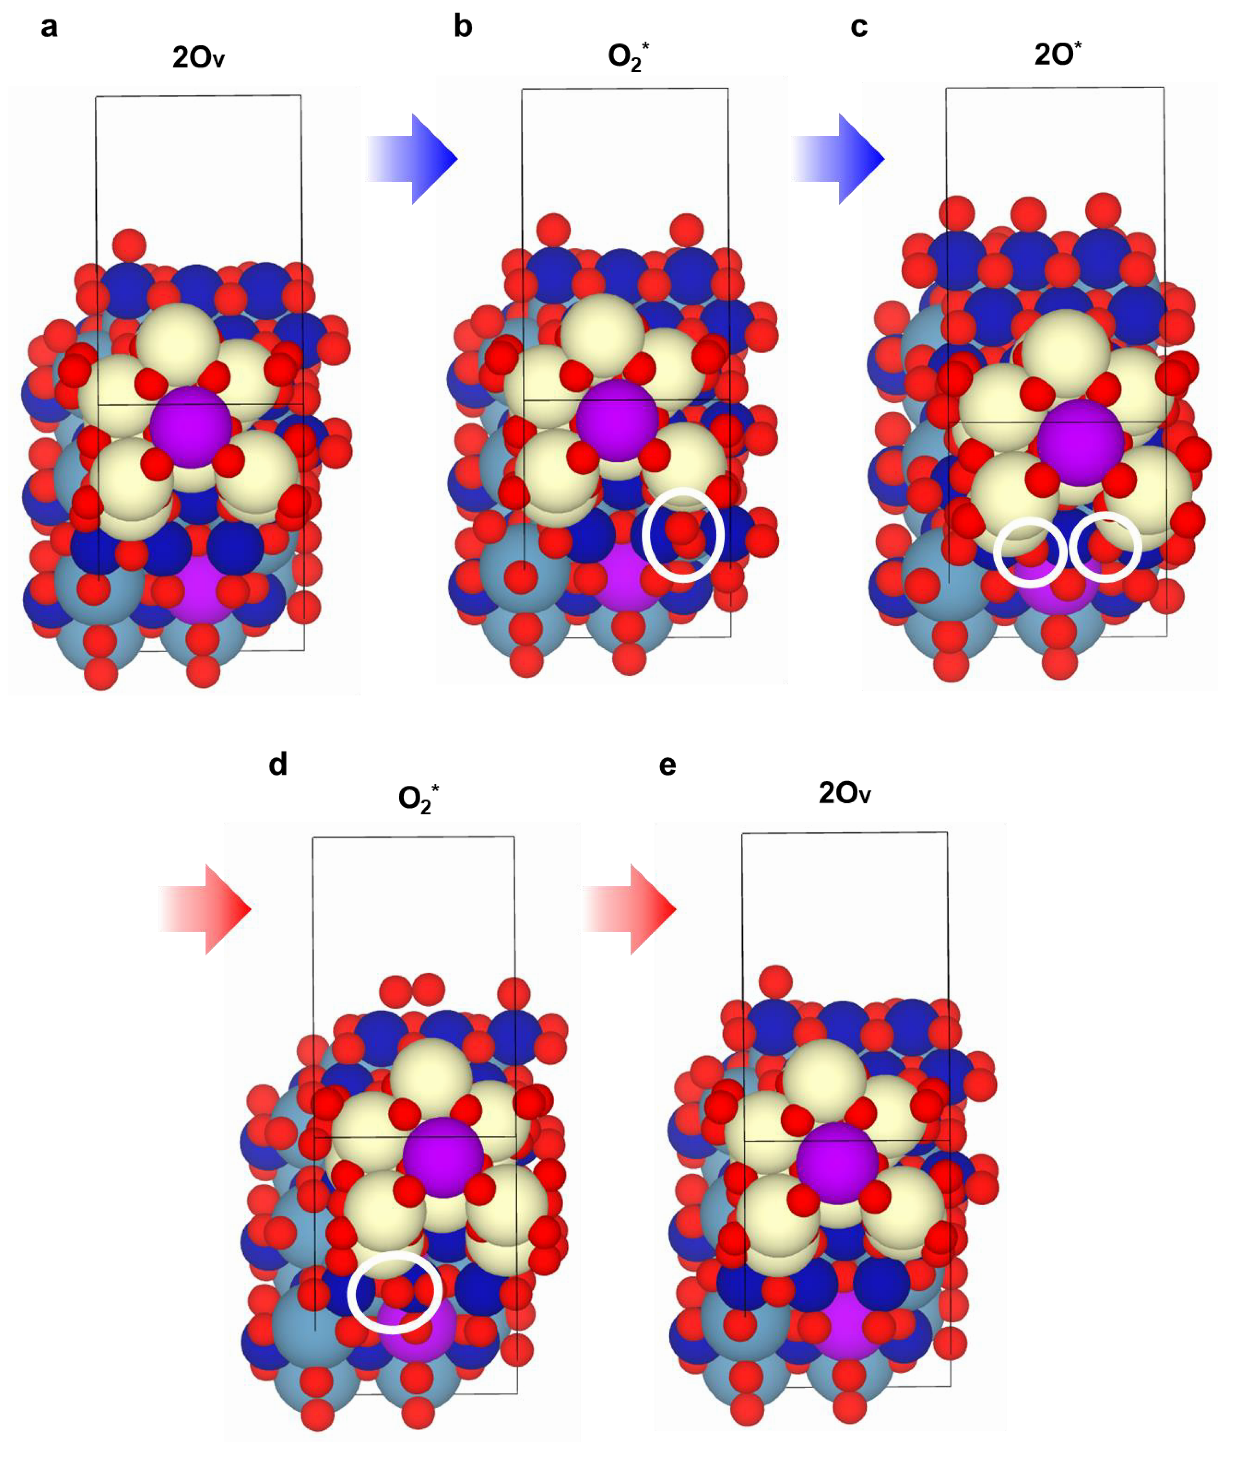
**

**Supplementary Figure 40. DFT-optimized reaction intermediate configurations for oxygen exchange reaction on GCCCO-GDC. a,** slab with two oxygen vacancies. **b**, incorporated oxygen molecule. **c**, incorporated two oxygen atoms from dissociated oxygen molecule. **d,** associated oxygen atoms. **e,** slab with two oxygen vacancies.

**
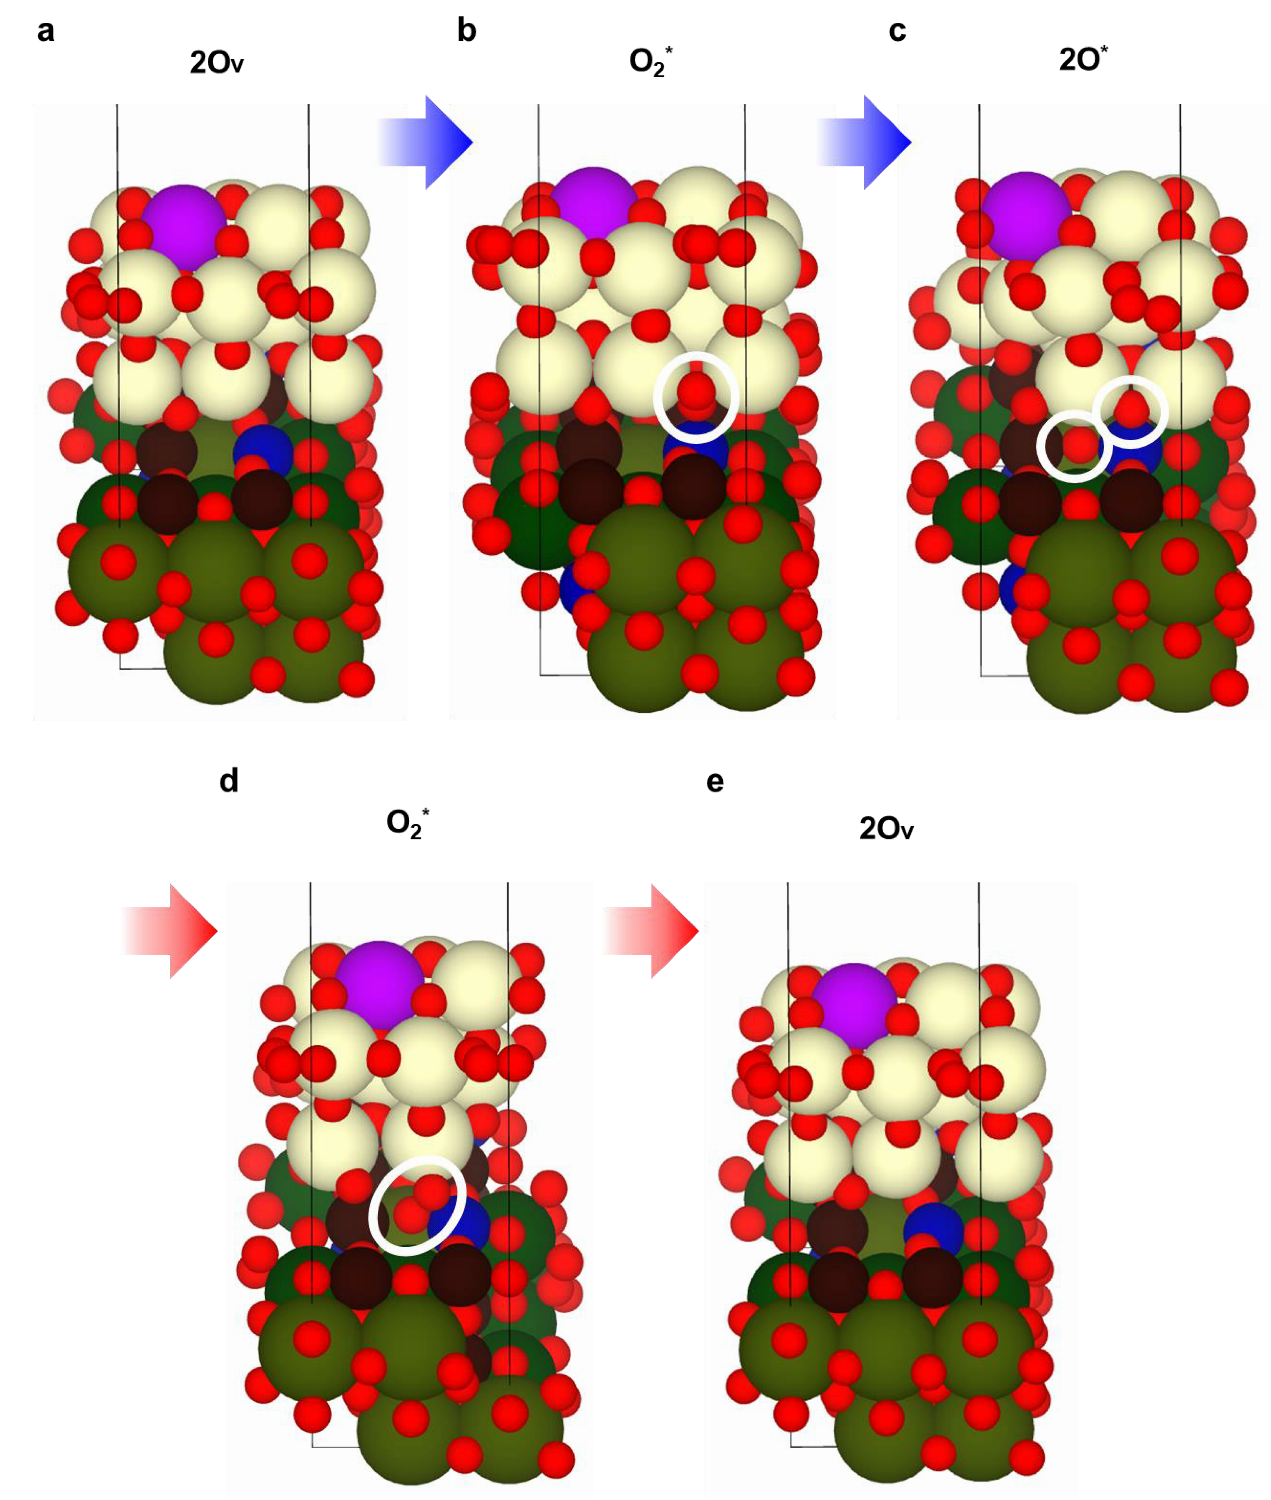
**

**Supplementary Figure 41. DFT-optimized reaction intermediate configurations for oxygen exchange reaction on LSCF-GDC. a,** slab with two oxygen vacancies. **b**, incorporated oxygen molecule. **c**, incorporated two oxygen atoms from dissociated oxygen molecule. **d,** associated oxygen atoms. **e,** slab with two oxygen vacancies.


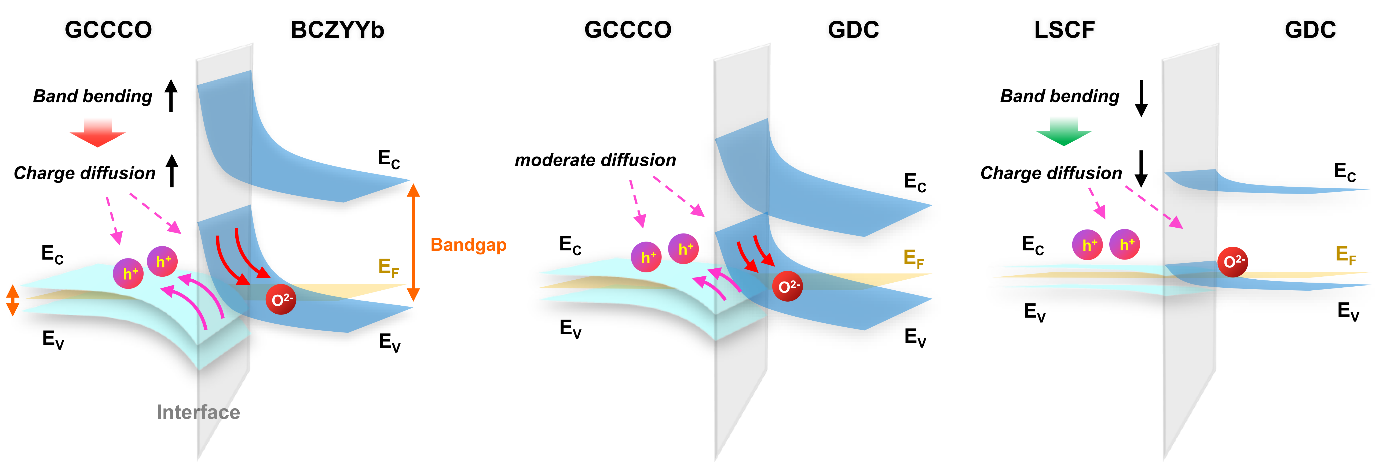


**Supplementary Figure 42. Schematic illustration of DFT-calculated energy band structure of GCCCO-BCZYYb, GCCCO-GDC, and LSCF-GDC.** Here, EV represents the valence band maximum (VBM), EC​ represents the conduction band minimum (CBM), and EF​ represents the Fermi level. The specific values of the band structures of GCCCO, BCZYYb, GDC and LSCF are presented in Supplementary Table 6.

**References**

1. Grimaud, A., Bassat, J. M., Mauvy, F., Simon, P., Canizares, A., Rousseau, B., Marrony, M. & Grenier, J. C. Transport properties and in-situ Raman spectroscopy study of BaCe0.9Y0.1O3-δ as function of water partial pressures, *Solid State Ionics* **191**, 24-31 (2011).
2. I. H. Kim, D. K. Lim, Y. Namgung, H. Bae, J. Y. Park & S. J. Song, Electrical properties of BaZr0.5Ce0.3Y0.1Yb0.1O3-δ proton conductor for reversible proton-conducting solid oxide electrochemical cells, *Acta Mater.* **249**, 118800 (2023).
